# Supplementary material for: The preprophase band-associated kinesin-14 OsKCH2 is a processive minus-end-directed microtubule motor
Source: PubMed Central journal article supplement (PMC5852081; doi:10.1038/s41467-018-03480-w), 2018-03-14
Supplement: 41467_2018_3480_MOESM1_ESM.pdf [file 41467_2018_3480_MOESM1_ESM.pdf]

1

## Supplementary Information

2

### 3 Supplementary Figures 1-8

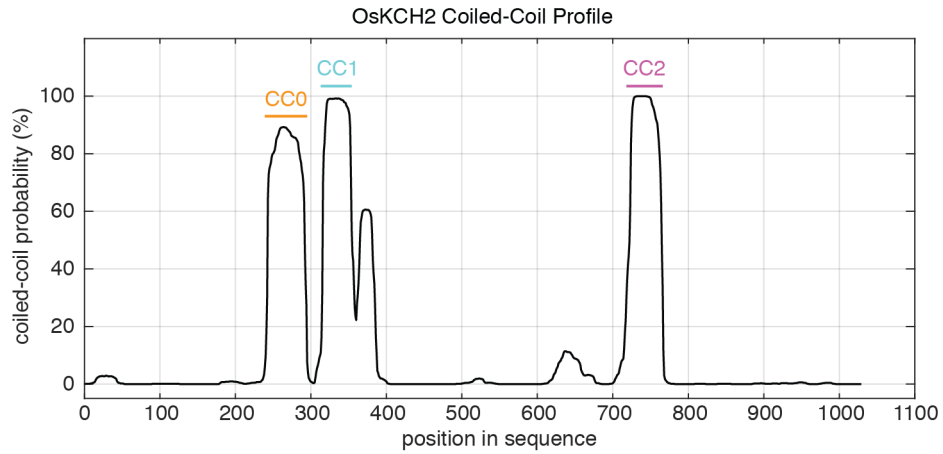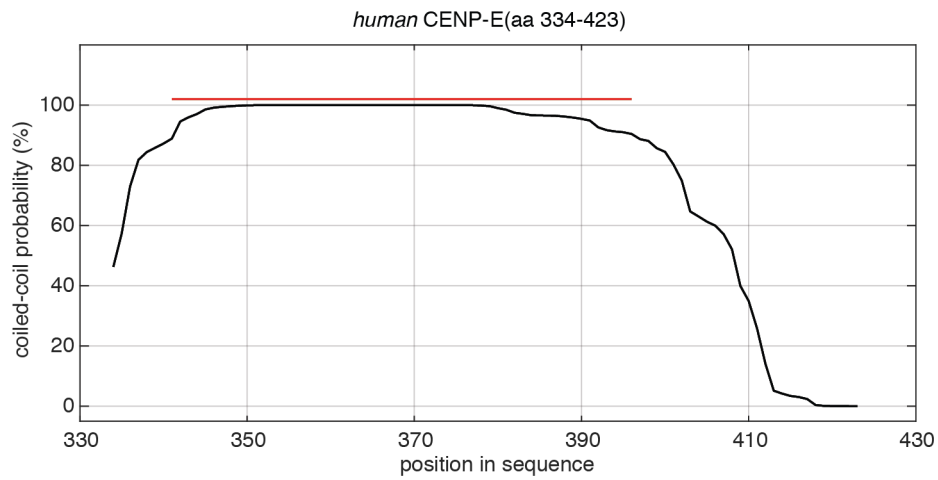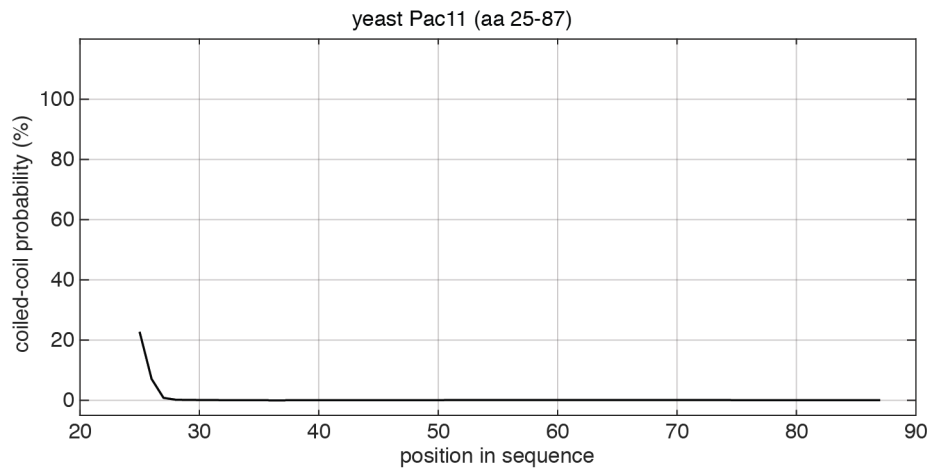

4

5 **Supplementary Figure 1: Predicted coiled-coil motifs of OsKCH2.** (Top) Based on  
6 the prediction by the program MARCOIL with a coiled-coil cutoff probability of 80%, the  
7 full-length OsKCH2 contains three coiled-coils, which include CC0 in aa 239-295, CC1  
8 in aa 313-354, and CC2 in aa 718-766. (Middle) The predicted coiled-coil profile of  
9 human kinesin-7 CENP-E(aa 343-423) by MARCOIL. Red line depicts the region that  
10 forms an actual coiled-coil structure based on X-ray crystallography<sup>1</sup>. This serves as a  
11 positive control of the coiled-coil prediction of OsKCH2 by MARCOIL. (Bottom) The  
12 predicted coiled-coil profile by MARCOIL of yeast Pac11(aa 25-87) that was  
13 experimentally found to be intrinsically disordered<sup>2</sup>. This serves as a negative control of  
14 the coiled-coil prediction of OsKCH2 by MARCOIL<sup>3</sup>.

15  
16

17

18

19

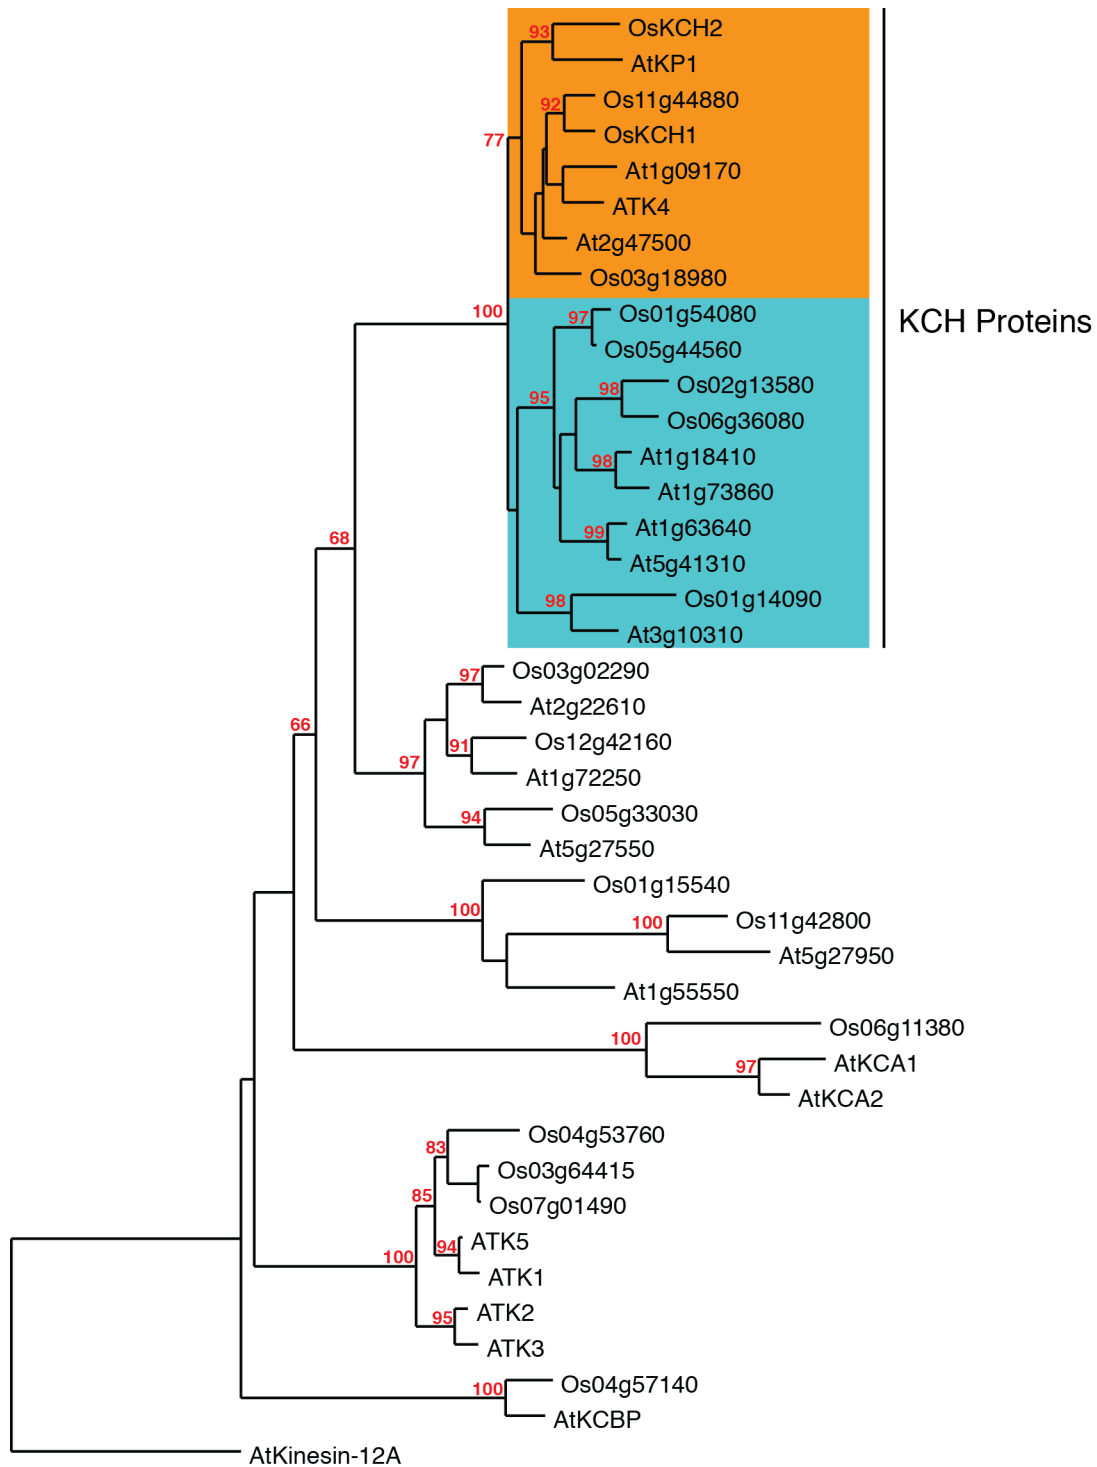

20

21 **Supplementary Figure 2: Phylogenetic tree of kinesin-14 motors from *Oryza***

22 ***sativa* and *Arabidopsis thaliana*.** The phylogenetic tree was generated with the

23 program PhyML ([www.phylogeny.fr](http://www.phylogeny.fr)) based on the full-length protein sequences of the

24 kinesin-14 family from *Oryza sativa* (japonica cultivar) and *Arabidopsis thaliana*. The  
25 maximum likelihood method was used. Branch support values were represented in  
26 percentages (%), and only values greater than 60% were shown in the tree. Protein  
27 sequence data of *O. sativa* (japonica cultivar) were obtained from MSU RGAP Release  
28 7 (<http://rice.plantbiology.msu.edu/>; "LOC\_" was omitted from each locus call) except for  
29 OsKCH2, which was not annotated in the release; Protein sequence data of *A. thaliana*  
30 were from TAIR10 (<http://www.arabidopsis.org/>); AtKCH1=LOC\_Os12g36100.  
31 AtKP1=At3g44730; ATK1=At4g21270/KATA; ATK2=At4g27180/KATB;  
32 ATK3=At5g54670/KATC; ATK4=At5g27000/KATD; ATK5=At4g05190;  
33 AtKCA1=At5g10470/KAC1; AtKCA2=At5g65460/KAC2; AtKCBP=At5g65930.  
34 AtKinesin-12A/At4g14150 was included as an outgroup protein in the analysis.  
35 Complete protein sequence alignment of all kinesin-14s in the phylogenetic tree can be  
36 found in Supplementary Data 1.

37  
38  
39  
40  
41  
42  
43  
44  
45  
46

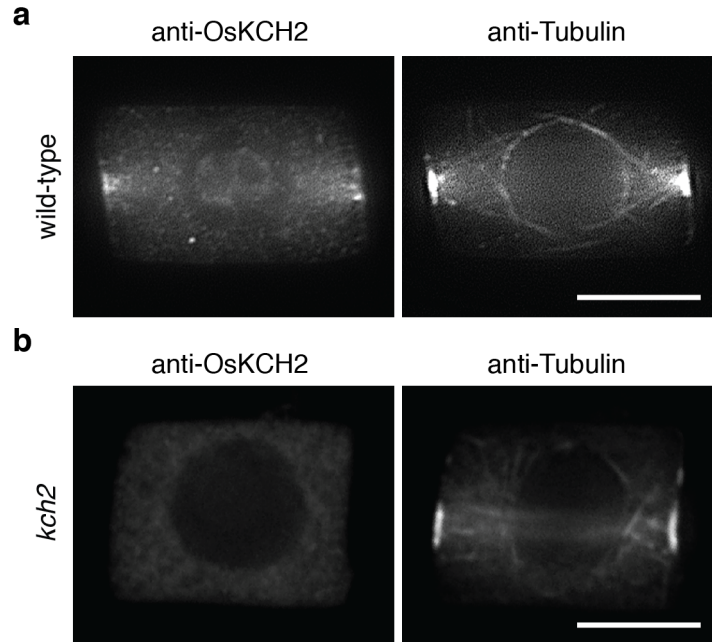

47

48 **Supplementary Figure 3: OsKCH2 exhibits cortical localization in a rice cell at**  
49 **prophase. a,** Immunostaining of a wildtype rice cell using anti-OsKCH2 (left) and anti-  
50 Tubulin (right). **b,** Immunostaining of a *kch2* mutant cell using anti-OsKCH2 (left) and  
51 anti-Tubulin (right). Scale bar: 5  $\mu$ m.

52

53

54

55

56

57

58

59

60

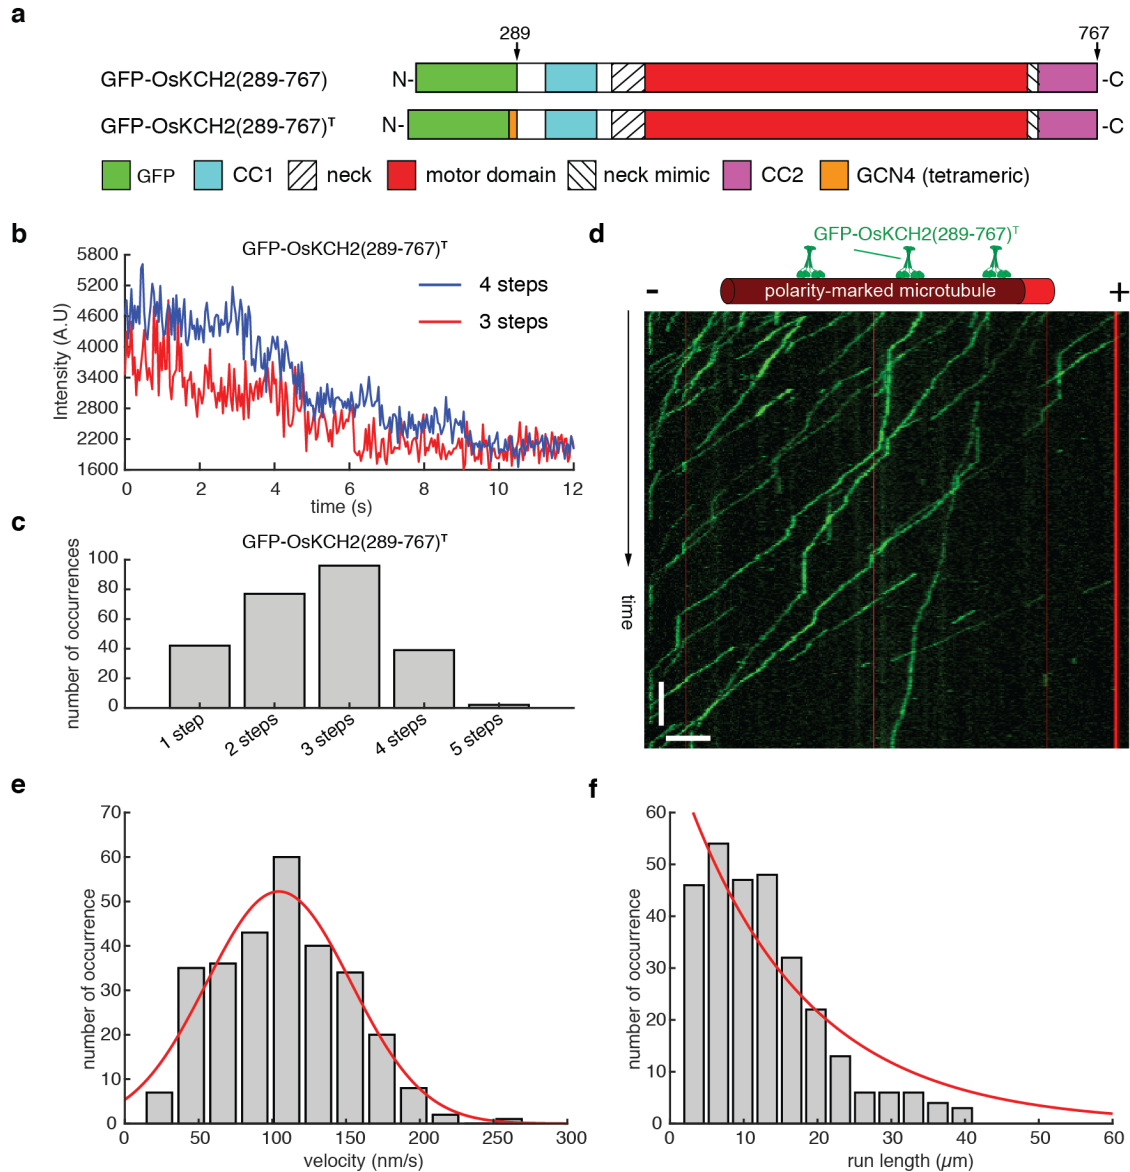

61

62 **Supplementary Figure 4: The artificial homotetramer GFP-OsKCH2(289-767)<sup>T</sup>**

63 **exhibits ultraprocessive minus-end-directed motility on single microtubules. a,**

64 **Schematic diagrams of GFP-OsKCH2(289-767) and GFP-OsKCH2(289-767)<sup>T</sup>. b,**

65 **Example fluorescence intensity traces over time of individual GFP-OsKCH2(289-767)<sup>T</sup>**

66 **molecules immobilized on the microtubules. c, Histogram of the photobleaching steps of**

67 **GFP-OsKCH2(289-767)<sup>T</sup> (n = 255). d, Example kymograph showing that individual**

68 **GFP-OsKCH2(289-767)<sup>T</sup> molecules move processively toward the minus-end on a**

69 single microtubule. **e**, Velocity histogram of single GFP-OsKCH2(289-767)<sup>T</sup> molecules.  
70 Red line indicates a Gaussian fit to the velocity histogram. **f**, Run-length histogram of  
71 single GFP-OsKCH2(289-767)<sup>T</sup> molecules. Red line indicates a single-exponential fit to  
72 the run-length histogram. Scale bars: 1 minute (vertical) and 5  $\mu\text{m}$  (horizontal).

73

74

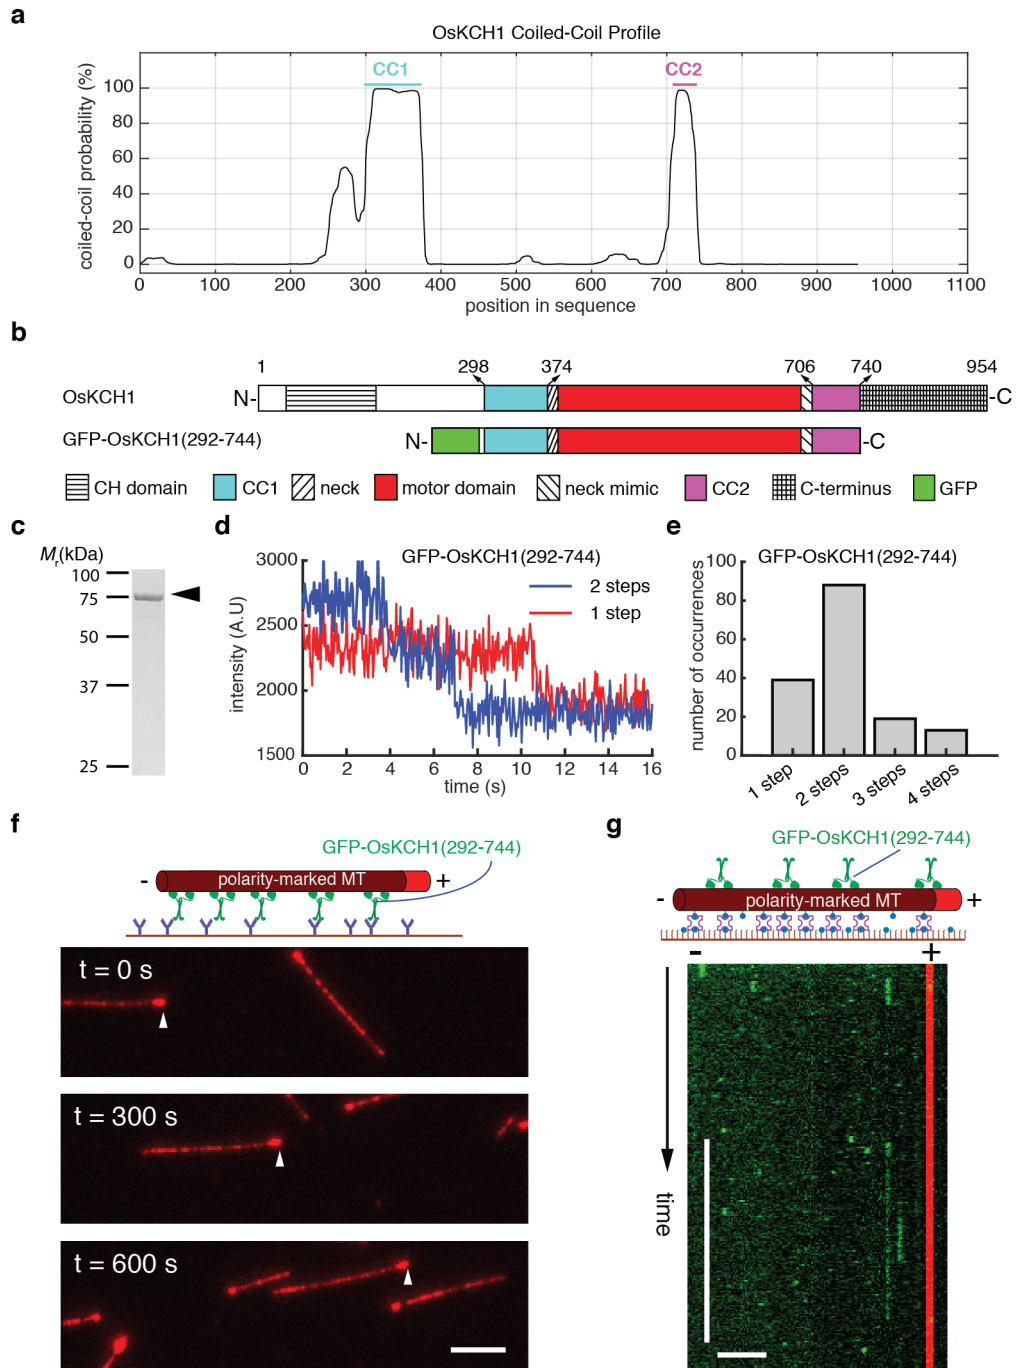

75

76

77

78



79 **Supplementary Figure 5: GFP-OsKCH1(292-744) is a nonprocessive minus-end-**  
80 **directed microtubule motor. a,** Predicted coiled-coil motifs of OsKCH1. Based on the  
81 prediction by the program MARCOIL with a coiled-coil cutoff probability of 80%. The full-  
82 length OsKCH1 contains an upstream putative coiled-coil (CC1, aa 298-374) and a  
83 downstream putative coiled-coil (CC2, aa 706-740). **b,** Schematic diagrams of the full-  
84 length OsKCH1 and GFP-OsKCH1(292-744). **c,** Coomassie-stained SDS-PAGE of  
85 purified recombinant GFP-OsKCH1(292-744). **d,** Example fluorescence intensity traces  
86 over time of individual GFP-OsKCH1(292-744) molecules immobilized on the  
87 microtubules. **e,** Histogram of the photobleaching steps of GFP-OsKCH1(292-744) (n =  
88 156). **f,** Micrograph montage showing surface-immobilized GFP-OsKCH1(292-744)  
89 molecules drive microtubules to glide with minus-end-directed motility. White  
90 arrowheads indicate the plus ends of polarity-marked microtubules. **g,** Example  
91 kymograph showing that individual GFP-OsKCH1(292-744) molecules are unable to  
92 produce processive motility on a single microtubule. Scale bars: 30 s (vertical) and 5  
93  $\mu\text{m}$  (horizontal).

94

95

96

|                 |     |                                                                                                                                                                                                                                                                                                                                                                                                        |     |    |    |    |    |  |  |
|-----------------|-----|--------------------------------------------------------------------------------------------------------------------------------------------------------------------------------------------------------------------------------------------------------------------------------------------------------------------------------------------------------------------------------------------------------|-----|----|----|----|----|--|--|
|                 |     | 10                                                                                                                                                                                                                                                                                                                                                                                                     | 20  | 30 | 40 | 50 | 60 |  |  |
| OsKCH2(289-767) | 289 | MKETSECF L T S L R L P C G R R K Q L D D G G G L E H Q Q E E L E K L K V S F N E M K L Q V E S T R S Q W E E D L R                                                                                                                                                                                                                                                                                     | 349 |    |    |    |    |  |  |
| OsKCH1(292-744) | 292 | - - - - - G E V K Q F Q L E A Q T N F D V Q Q K Q I Q E L K G A L S F V K S G M E Q L R L Q Y S E E F A                                                                                                                                                                                                                                                                                                | 338 |    |    |    |    |  |  |
| OsKCH2(289-767) | 350 | R L E S Y F E A H N - - H N A Y H K L L E E N R K L Y N Q V Q D L K G S I R V Y C R V K P F L K M Q T D Q R S T V D H I G                                                                                                                                                                                                                                                                              | 408 |    |    |    |    |  |  |
| OsKCH1(292-744) | 339 | K L G K H F Y T L S N A A S Y H K V L E E N R K L Y N Q I Q D L K G N I R V Y C R V R P F L P G H R S L S S V A D T E                                                                                                                                                                                                                                                                                  | 399 |    |    |    |    |  |  |
| OsKCH2(289-767) | 409 | E N G E I M I V N P Q Q G K E G R K M F S F N K I F G P N A S Q S E V F A D T Q P L I R S V M D G Y N V C I F A Y G Q T                                                                                                                                                                                                                                                                                | 469 |    |    |    |    |  |  |
| OsKCH1(292-744) | 400 | E R - T I T I I T P T K Y G K D G C K S F S F N R V F G P A S T Q E E V F S D M Q P L I R S V L D G F N V C I F A Y G Q T                                                                                                                                                                                                                                                                              | 459 |    |    |    |    |  |  |
| OsKCH2(289-767) | 470 | G S G K T Y T M S G P D I T T E E T W G V N Y R S L N D L F A I S Q N R A D T T T Y D V K V Q M I E I Y N E Q V R D L L M                                                                                                                                                                                                                                                                              | 530 |    |    |    |    |  |  |
| OsKCH1(292-744) | 460 | G S G K T F T M S G P K V L T E E S L G V N Y R A L N D L F N I K A Q R K G T I D Y E I S V Q M I E I Y N E Q V R D L L Q                                                                                                                                                                                                                                                                              | 520 |    |    |    |    |  |  |
| OsKCH2(289-767) | 531 | V D G A N K R L E I R N S S H V N G L N I P D A N L V P V K C A Q D V L D L M R V G H R N R A V G S T A L N E R S S R S H                                                                                                                                                                                                                                                                              | 591 |    |    |    |    |  |  |
| OsKCH1(292-744) | 521 | - D G G N R R L E I R N T P O K - G L A V P D A S I V P V T S T A D V V E L M N Q G Q K N R A V G S T A I N D R S S R S H                                                                                                                                                                                                                                                                              | 579 |    |    |    |    |  |  |
| OsKCH2(289-767) | 592 | S V L T V H V Q G K E I A S G S T L R G C L H L V D L A G S E R V D K S E A A G E R L N E A K H I N K S L S A L G D V I A                                                                                                                                                                                                                                                                              | 652 |    |    |    |    |  |  |
| OsKCH1(292-744) | 580 | S C L S V H V Q G K Y L T S G A M L R G C M H L V D L A G S E R V D K S E V V G D R L K E A Q Y I N K S L S A L G D V I A                                                                                                                                                                                                                                                                              | 640 |    |    |    |    |  |  |
| OsKCH2(289-767) | 653 | A L A Q K S S H V P Y R N S K L T Q V L Q D A L G G Q A K T L M F V H M N P E A D A F G E T M S T L K F A E R V A T V E L                                                                                                                                                                                                                                                                              | 713 |    |    |    |    |  |  |
| OsKCH1(292-744) | 641 | S L A Q K N S H V P Y R N S K L T Q L L Q D S L G G Q A K T L M F V H V S P E L D A V G E T I S T L K F A E R V A S V E L                                                                                                                                                                                                                                                                              | 701 |    |    |    |    |  |  |
| OsKCH2(289-767) | 714 | G A A H A N K <b>E</b> V G Q V <b>K</b> <b>D</b> <b>L</b> <b>K</b> <b>E</b> <b>E</b> <b>S</b> <b>K</b> <b>L</b> <b>K</b> <b>L</b> <b>A</b> <b>L</b> <b>D</b> <b>D</b> <b>K</b> <b>E</b> <b>R</b> <b>E</b> <b>A</b> <b>S</b> <b>K</b> <b>L</b> <b>R</b> <b>I</b> <b>A</b> <b>N</b> <b>R</b> <b>V</b> <b>A</b> <b>S</b> <b>E</b> <b>K</b> <b>R</b> <b>N</b> <b>A</b> <b>R</b> <b>T</b> <b>R</b> <b>S</b> | 767 |    |    |    |    |  |  |
| OsKCH1(292-744) | 702 | G A A K A N <b>K</b> <b>G</b> <b>S</b> <b>E</b> <b>V</b> <b>R</b> <b>E</b> <b>L</b> <b>K</b> <b>S</b> <b>E</b> <b>I</b> <b>A</b> <b>T</b> <b>L</b> <b>K</b> <b>A</b> <b>A</b> <b>L</b> <b>A</b> <b>K</b> <b>K</b> <b>E</b> <b>G</b> <b>E</b> <b>P</b> <b>N</b> <b>I</b> <b>Q</b> <b>S</b> <b>T</b> <b>-</b> <b>-</b> <b>-</b> <b>-</b> <b>-</b> <b>-</b> <b>-</b>                                      | 740 |    |    |    |    |  |  |

97

98 **Supplementary Figure 6: OsKCH2(289-767) and OsKCH1(292-744) differ**

99 **drastically in the CC2 region.** Pairwise protein alignment of OsKCH2(289-767) and

100 OsKCH1(292-744). The neck mimic region is indicated by asterisk (\*) and the CC2

101 region is indicated by the underline. Positively charged residues in the CC2 region are

102 highlighted in blue and negatively charged residues in red.

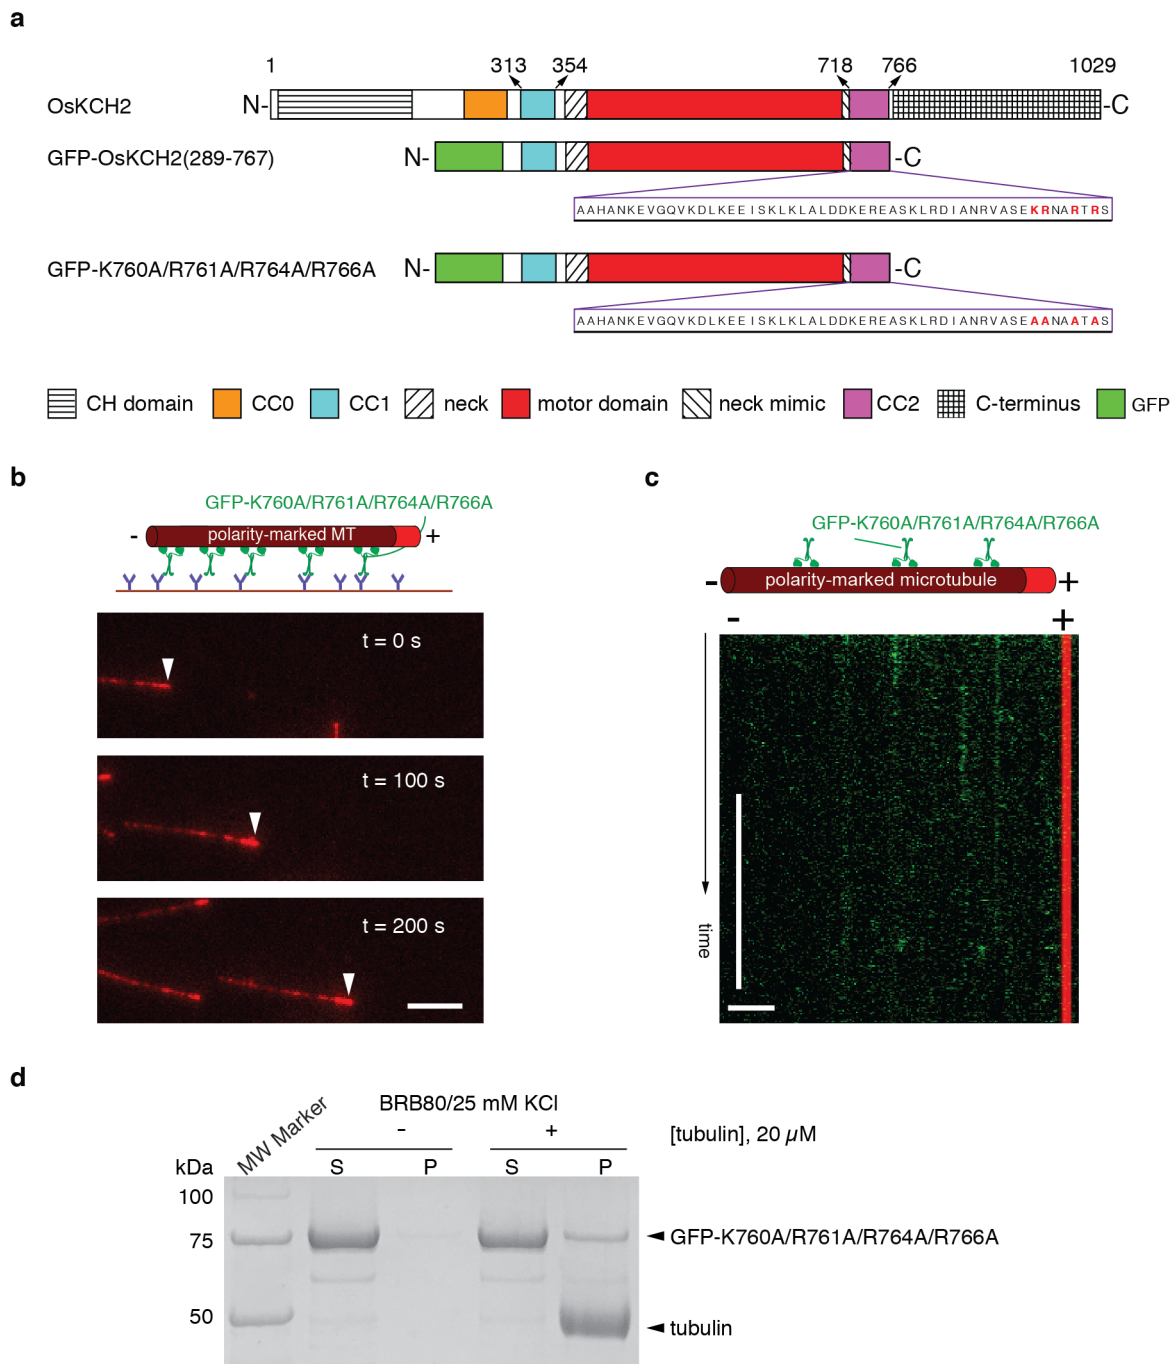

103

104 **Supplementary Figure 7: The quadruple mutant GFP-K760A/R761A/R764A/R766A**

105 **is a nonprocessive minus-end-directed motor on single microtubules. a.**

106 Schematic diagrams of the full-length OsKCH2, GFP-OsKCH2(289-767) and GFP-

107 K760A/R761A/R764A/R766A. **b.** Micrograph montage showing that surface-immobilized  
108 GFP-K760A/R761A/R764A/R766A molecules drive microtubules to glide with minus-  
109 end-directed motility. White arrowheads indicate the plus ends of polarity-marked  
110 microtubules. **c.** Example kymograph showing that individual GFP-  
111 K760A/R761A/R764A/R766A molecules are unable to produce processive motility on a  
112 single microtubule. **d.** Coomassie-stained SDS-PAGE of the microtubule co-  
113 sedimentation assay for GFP-K760A/R761A/R764A/R766A in BRB80/25 mM KCl.  
114 Scale bars: 30 s (vertical) and 5  $\mu$ m (horizontal).

115

116

117

118

119

120

121

122

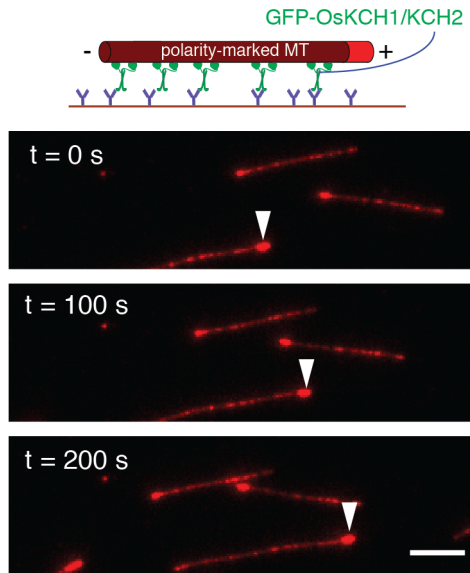

123

124 **Supplementary Figure 8: GFP-OsKCH1/KCH2 exhibits minus-end-directed motility**

125 **in the ensemble microtubule-gliding assay.** Micrograph montage showing surface-

126 immobilized GFP-OsKCH1/KCH2 molecules drive microtubules to glide with minus-end-

127 directed motility. White arrowheads indicate the plus ends of polarity-marked

128 microtubules.

129

130 **Supplementary References:**

131

- 132 1. Phillips, R. K., Peter, L. G., Gilbert, S. P. & Rayment, I. Family-specific kinesin  
133 structures reveal neck-linker length based on Initiation of the coiled-coil. *J. Biol.*  
134 *Chem.* **291**, 20372–20386 (2016).
- 135 2. Jie, J., Löhr, F. & Barbar, E. Interactions of yeast dynein with dynein light chain and  
136 dynactin: General implications for intrinsically disordered duplex scaffolds in  
137 multiprotein assemblies. *J. Biol. Chem.* **290**, 23863–23874 (2015).
- 138 3. Delorenzi, M. & Speed, T. An HMM model for coiled-coil domains and a  
139 comparison with PSSM-based predictions. *Bioinformatics* **18**, 617–625 (2002).

140
