# Supplementary material for: The preprophase band-associated kinesin-14 OsKCH2 is a processive minus-end-directed microtubule motor
Source: PubMed Central journal article supplement (PMC5852081; doi:10.1038/s41467-018-03480-w), 2018-03-14
Supplement: 41467_2018_3480_MOESM4_ESM.pdf [file 41467_2018_3480_MOESM4_ESM.pdf]

Os06g11380 -----  
 AtKCA1 -----  
 AtKCA2 -----  
 AtKinesin-12A -----  
 At3g10310 -----  
 Os01g14090 -----  
 At1g63640 -----  
 At5g41310 -----  
 Os02g13580 -----  
 Os06g36080 -----  
 Os01g54080 -----  
 Os05g44560 -----  
 At1g18410 -----  
 At1g73860 -----  
 Os11g44880 -----  
 OsKCH1 -----  
 Os03g18980 -----  
 At2g47500 -----  
 At1g09170 -----  
 ATK4 -----  
 AtKP1 -----  
 OsKCH2 -----  
 AtKCBP MEGQ<sup>R</sup>GSNS<sup>S</sup>LSSGNGTEVAT<sup>D</sup>VSSCFY<sup>V</sup>VFNPSGTDFDAESS<sup>S</sup>LP<sup>L</sup>LLSLCHSS<sup>S</sup>FAP-QV  
 Os04g57140 -----MNGGGA-----SGGDGYDS<sup>D</sup>GYSFAP-----PTPTTL  
 At1g55550 -----  
 Os01g15540 -----  
 At5g27950 -----  
 Os11g42800 -----  
 ATK2 -----  
 ATK3 -----  
 ATK5 -----  
 ATK1 -----  
 Os03g64415 -----  
 Os04g53760 -----  
 Os07g01490 -----  
 At2g22610 -----  
 Os03g02290 -----  
 At1g72250 -----  
 Os12g42160 -----  
 At5g27550 -----  
 Os05g33030 -----

Os06g11380 -----  
 AtKCA1 -----  
 AtKCA2 -----  
 AtKinesin-12A -----  
 At3g10310 -----  
 Os01g14090 -----  
 At1g63640 -----  
 At5g41310 -----  
 Os02g13580 -----MGVAK<sup>F</sup>SAS<sup>D</sup>LERGQMTAV  
 Os06g36080 -----  
 Os01g54080 -----  
 Os05g44560 -----  
 At1g18410 -----  
 At1g73860 -----  
 Os11g44880 -----  
 OsKCH1 -----  
 Os03g18980 -----  
 At2g47500 -----  
 At1g09170 -----  
 ATK4 -----  
 AtKP1 -----  
 OsKCH2 -----  
 AtKCBP ALSIPAE<sup>L</sup>AAAIPLIDRFQ<sup>V</sup>EAF<sup>L</sup>RLMQ<sup>K</sup>QIQSAG<sup>K</sup>RGFF<sup>F</sup>YSK<sup>K</sup>SSGSN<sup>V</sup>RER<sup>F</sup>TFEDML  
 Os04g57140 -----SMSIPPELAGAIPLIDRFQ<sup>V</sup>E<sup>G</sup>FLKAMQ<sup>K</sup>QIHSAG<sup>K</sup>RGFF-SK<sup>K</sup>SVGPH<sup>V</sup>REK<sup>F</sup>TLEDML  
 At1g55550 -----  
 Os01g15540 -----  
 At5g27950 -----  
 Os11g42800 -----

ATK2  
ATK3  
ATK5  
ATK1  
Os03g64415  
Os04g53760  
Os07g01490  
At2g22610  
Os03g02290  
At1g72250  
Os12g42160  
At5g27550  
Os05g33030

Os06g11380  
AtKCA1  
AtKCA2  
AtKinesin-12A  
At3g10310  
Os01g14090  
At1g63640  
At5g41310  
Os02g13580  
Os06g36080  
Os01g54080  
Os05g44560  
At1g18410  
At1g73860  
Os11g44880  
OsKCH1  
Os03g18980  
At2g47500  
At1g09170  
ATK4  
AtKP1  
OsKCH2  
AtKCBP  
Os04g57140  
At1g55550  
Os01g15540  
At5g27950  
Os11g42800  
ATK2  
ATK3  
ATK5  
ATK1  
Os03g64415  
Os04g53760  
Os07g01490  
At2g22610  
Os03g02290  
At1g72250  
Os12g42160  
At5g27550  
Os05g33030

Os06g11380  
AtKCA1  
AtKCA2  
AtKinesin-12A  
At3g10310  
Os01g14090  
At1g63640  
At5g41310  
Os02g13580  
Os06g36080  
Os01g54080  
Os05g44560  
At1g18410

At1g73860 TPRSFFSPFSPLSVDDRRHFNHADTK-----  
 Os11g44880 GEEAVVATAAVVEDGLRNGDGGGGGVGEVVGVRSIDMEWRK---AEEAAIRRYE---  
 OsKCH1 AAVEEEEMVERMHGWARDMDVASRR-----AEEEMRRYD---  
 Os03g18980 AALFSLSAAAVVEDVLRQHGCRLSD-----RDLASRRAEAAAARRNE---  
 At2g47500 DGGLSFTVASVMEDVLRQHGNGLRD-----HDLVSRRAEEAASRRYE---  
 At1g09170 QQDSQLCLATILEDFLKQRIQVSV--GVDSSSLKKADETFGGRDLPVDPDLRRYE---  
 ATK4 NNDLSFVSIVEDVLRQHSSRSSD-----VGLVSRKVEESSLRRYE---  
 AtKP1 -----  
 OsKCH2 -----MAAAEGRHDQGMALRK-----AEEAARRCE---  
 AtKCBP LKRVELRDELFAQISKQTRHNPDFRQYLIKAWELMYLCASSMPPSKDIGGYLSEYIHNVAH  
 Os04g57140 LKRSELRDELFAQISKQTRNPDFRAWLIRAWELMYLCASSMPPSKDIGAYLSEYVHYIAH  
 At1g55550 -----  
 Os01g15540 -----  
 At5g27950 -----  
 Os11g42800 -----  
 ATK2 TNNGRIRPSFPVKDLTSNEGSEYGG-----  
 ATK3 ANNGRIRSAFPVTNGSKDLTPNSAP-----  
 ATK5 QNRAPLPSPNVKEALSSIPFDKRR-----KE---  
 ATK1 NQNRPPRSPNAKKEGLGGISFDKRR-----KVET---  
 Os03g64415 KPGSWLPEWKRIVVLLGSWTLGVRE-----  
 Os04g53760 TPRSFPYKKNLGNARRGMGVKPGP-----  
 Os07g01490 STRATRPGMLHQKENAADAQAGKRQ-----  
 At2g22610 IDDTFPVDLNGVTSLCSPEIPSFDF-----  
 Os03g02290 CPGEPTPMDFSWTTGWKKAADDE-----  
 At1g72250 ATDASPRPESFSRSAEKDIASRSRTVAMADLDSNCELSNDVDMEQSSPDLMKLEQSSDPV  
 Os12g42160 -----MEMEEEGSGRGG-----  
 At5g27550 -----  
 Os05g33030 FESFFFLLYFLKSKANPHDLSLAR-----

Os06g11380 -----  
 AtKCA1 -----  
 AtKCA2 -----  
 AtKinesin-12A -----MKKHFTLPRN-----  
 At3g10310 -----AVQWL-----KSVVGGQIGIPNPSEKEFISCLRNGMIL---CNAINKI  
 Os01g14090 -----AATWL-----ESVIGPFGLSRCPSEQEFVAAVRNGIVL---CKAINKI  
 At1g63640 -----LVEWL-----NETLPYLKLPWEASEDELRACLRDTGTVL---CSLLNQL  
 At5g41310 -----LVEWL-----NETLPYLNLPWEASEEELRACLVDGTVL---CNLLNQL  
 Os02g13580 PYRIACLLRKVILEIERRISTQAGHIRNQNNLIKAREEKYQSRIRVLEVL---AGGMEKD  
 Os06g36080 DRRRAEAVAWLRALLRGCG---GGGGGQLPPPHASEDDLRAALADGALL---CAALRRL  
 Os01g54080 -----VIDWL-----GGLLPEFDLPLDSSDEELRDYLINGEAL---CYVADKL  
 Os05g44560 -----AEVIEWL-----NALLPEYCLPLDSSDDELRELLSDGTVL---CHIVNAL  
 At1g18410 -----MLDNLTLNTPAESCESEEIQTALPSSSSSQDLVASDEDS---EDVELGD  
 At1g73860 -----TPRSFFSPFSPLSGDERHKSLAESKFQQALASSGQLDPLSPGSMH  
 Os11g44880 -----AANWLRV-----VGVVCGKDLAEEPSEEEFRLGLRNGIVL---CNALNKV  
 OsKCH1 -----AASWLRST-----VGVVCARDLPDEPSEEEFRLGLRNGIVL---CNALNKI  
 Os03g18980 -----AAGWLRRT-----VGAVAARDLPEEPSEEEFRLGLRNGQIL---CGALNRV  
 At2g47500 -----AANWLRM-----VGVVAKDLPAEPTTEGLRLGLRSGIIL---CKVLNKV  
 At1g09170 -----AARWVRNT-----LGVVGGRDLPADPSEEDFRIALRSGIIL---CNVLRV  
 ATK4 -----AAGWLRDM-----IGVSNKDFPGEPEEEFRLGLRSGIVL---CNVLRV  
 AtKP1 -----MDQGAMETLPEKPSDEFFSLALRNLIL---CNVLRV  
 OsKCH2 -----AARWLRQ-----MEAAAESLPERPSEEEFCVALRNLVL---CNVLRV  
 AtKCBP DATIEPDAQVLAVNTLKALKRSIKAGPRHTTPGREIEALLTGRKLTIVFFLDETFEEI  
 Os04g57140 GATTDSVRLALNTLNALKRSVKAGPRVTIPAREIEALLSSRKLTTIVFFLDETFEEI  
 At1g55550 -----MERTRSKPVRLPETIHSLL-----  
 Os01g15540 -----MDVQPARTM-----  
 At5g27950 -----MLISAKEGEILI-----  
 Os11g42800 -----  
 ATK2 -----PVEFTREDVETLLHERIKYK-----  
 ATK3 -----ASTTGSSEYGPVEFTREDVETLLNERIKYK-----  
 ATK5 -----TQGTGRQVLSVNRQDANSVGVSTEE---CGKVEFT  
 ATK1 -----QGGTGRQAFSAVNKQDVTMNSDVGSIEE---CGKVDFT  
 Os03g64415 -----NEKGSGRLIKWNGSGSREQKICKTTLPFQACIKHLNS  
 Os04g53760 -----RRNVLSAINNGGNTSDTASVDGGEGGAGPAPVIEFT  
 Os07g01490 -----RTAAGSAAARPLSANAAPPPDPAIEFA  
 At2g22610 -----VSDTEKLEIGDTSIDDCDALGDSMV---CDPNSRL  
 Os03g02290 -----AESAPAPAPPAPSPQEAESMI-----L  
 At1g72250 ALDGVVVLGFSLASFDL---VNCGASPDLPGRSYEDSFEFSKRRR---FSTELSL  
 Os12g42160 -----DGPAAHGRIGGDSVPMVSSASVRKTKMSETCDFIPYV  
 At5g27550 -----MERDQHQEICNDGGLL---CES---  
 Os05g33030 -----QIHAVDLISRLVSMTRQPSGRPFNPETGKSEMS---CTGA---

Os06g11380 -----  
AtKCA1 -----  
AtKCA2 -----  
AtKinesin-12A -----  
At3g10310 HPGAVSKVVENY---SYL-----  
Os01g14090 QPGAVPKVV---ANA-----  
At1g63640 SPGSM-----  
At5g41310 SPGSM-----  
Os02g13580 KFGDKGQLAVEDME--RLM-----  
Os06g36080 GCDPAA-----ASD-----  
Os01g54080 MPGV-----LEG-----  
Os05g44560 IPG-----VLE-----  
At1g18410 TFYSCSELLQRNCCVLPYK-----  
At1g73860 GGHKFHEVFQMKQGRYDLQ-----  
Os11g44880 QPGSVPKVVEA---PSD-----  
OsKCH1 QPGAIPKVVQAQSDAAG-----  
Os03g18980 HPGAVPKVVVNTAAD-SVL-----  
At2g47500 QPGAVSKVVEAPND--AIL-----  
At1g09170 KPGAVPKVVEAPND--PLV-----  
ATK4 NPGSVSKVVEAPDD-----  
AtKFP1 NPGSVLKVVENPITP-AIQ-----  
OsKCH2 NPGAVPKVVENPIV--AVQ-----  
AtKCBP SYDMATTVSDAVEELAGTIKLSAFSSFSLFECRKKVSSSSKSSDPGNEEYIGLDDNKYIGD  
Os04g57140 TYDMATTVADAVEELAGIIKLSVYSSFSLFECRKKVNGSKSSDVGNEEYIGLDDNKYIGD  
At1g55550 -----GLK-----  
Os01g15540 -----  
At5g27950 -----PQS-----  
Os11g42800 -----  
ATK2 -----SKY-----  
ATK3 -----SKF-----  
ATK5 KDEVLALLNERAKA--GKF-----  
ATK1 KDEILALLSERAKA--GKF-----  
Os03g64415 R-----DLL-----  
Os04g53760 GREDVERLLAEKMKGKSKT-----  
Os07g01490 GRDDVDALLNEKMKGKNKM-----  
At2g22610 VP-----TGL-----  
Os03g02290 VPGPRVVLS-----GLM-----  
At1g72250 ENGI DGSTTTTRLGRKSQV-----  
Os12g42160 DDDDDGNSSEENSASSGIL-----  
At5g27550 -----KEV-----  
Os05g33030 -----

Os06g11380 -----MAD-----  
AtKCA1 MADQRS-----  
AtKCA2 MAEQK-----  
AtKinesin-12A RDGGEPHSPNPSISK-----  
At3g10310 NGEYQLPPAYQYFEN--VRNFLVALETLRLPGEASDLEKDNLESGSVTK  
Os01g14090 SCDGQPSTAFQYFEN--IRNFLVAVQELKLPCEASDLEKDNIDAGSVGK  
At1g63640 RMGGSFEPASVKIER---FLTAMDEMALPRFEVSDIEQ----GDMVP  
At5g41310 RMGGSFEPGCVNIER---FLAAMDENTLPRFESLKALKASFDDGYDK  
Os02g13580 KYQDDVVRMLKENED--LVRLLEKEDMVRLLEKEDMVRLLEKEGMIN  
Os06g36080 EGTGSAAAAAAAAAAGEGDVGRFLAAERMGLPGFSPSDDLT----GPVSS  
Os01g54080 TWGGYASDQRSNVKK---FLSVVAEMGLPGFVGDLEE----GSMSS  
Os05g44560 ESWGAYASSDQHAGH--VKKFLAVVADMGLPGFVGDLEE----GSMSS  
At1g18410 AQKKTKENPFDFDVR-----TWSSPCDFPRFGEMILLSPVLNMPFFS  
At1g73860 ASKISEMMKSSSLDNAPTQSLLSVLNGILDESIERKNGEIPQRVACLRLK  
Os11g44880 SADGAALCAYQYFEN--VRNFLMGLQDLGLPTFEASDLEK---GGKVR  
OsKCH1 PTDGSALCAYQYFEN--LRNFLVVVEDLRLPTFEVSDLEK---GGKVR  
Os03g18980 QPDGAALSFAFYFEN--VRNFLVAAQIQLPCFEASDLEQ---GGKSAR  
At2g47500 VADGAPLSAFQYFEN--VRNFLVAIQEMGPTFEASDLEQ---GGNSAR  
At1g09170 NQDGAALSFAFYFEN--LRNFLVFVEEMGIPTFEVSDFEK---GGKSAR  
ATK4 VADGAALSFAFYFEN--IRNFLVAIEEMGLPSFEASDMEK---GGKSIR  
AtKFP1 YADGAAQSAIQYFEN--MRNFLKAVEDMQLLTFGASDLEK---GGSSNK  
OsKCH2 SSDVAAQSAIQYFEN--MRNFLVAVSEMNLTFEASDIEK---GGSSMK  
AtKCBP LLAEFKAIKDRNKGEILHCKLVFKKKLFRSEDAVTDLMFVQLSYVQLQHDYLLGNYPVG  
Os04g57140 LLSEFKAARDNKGEILHCKLVFKKRLFRSEDAITDPMFVQLSYVQLQHDYLLGNYPVG  
At1g55550 -----  
Os01g15540 RNLPDTLSSLMGFNK-----

At5g27950 ----- PLSSESVVPLVYTDV -----  
Os11g42800 ----- MEGHVIVP -----  
ATK2 ----- NYKERCENTMDYVKR --LRLCIRWFQELELDYAFEQEKLKNAM-EMNEKH  
ATK3 ----- NYKERCENTMDYIKR --LRLCIRWFQELELDYAFEQEKLKNAL-ELNEKH  
ATK5 ----- DTGKIEQMTDIKK --LKVCVRWYQQVDETHVQDKENLSSSL-QSAEKR  
ATK1 ----- DTKAKIEQMTDIKR --LKVCVKWFQQADETHVQEKENLKVSL-ESSEQK  
Os03g64415 ----- STKVLTLALYKYILR ----- APQTAPHPPAAPPRTEVASSTAGRASR  
Os04g53760 ----- DYKGRTEQMSEYIKK --LRACIRWYIELEDGYLVEQEKLKLRSTMDAENAQH  
Os07g01490 ----- DYKKGSEQMMYIKK --LRACIKWLLEREDTNLAEIGKLNGLL-EAAEKH  
At2g22610 ----- TRTNRTDETIMFINA ----- GGDDSK  
Os03g02290 ----- RGDCRADDVLFINA ----- GGSATE  
At1g72250 ----- VKFSAICQTFGYELS ----- PESSFELPSPPGDFRESMPVISINSGSI  
Os12g42160 ----- PCDGMQHDTPDYIRR ----- GAAAAA  
At5g27550 ----- SVNHNHSDA -----  
Os05g33030 ----- PSNGRLVSASSKIKS ----- APPISF

Os06g11380 ----- TRGRWADVPGFEPF -----  
AtKCA1 ----- KTNRWNEVSGFEPF -----  
AtKCA2 ----- STNMWNWEVTGFESK -----  
AtKinesin-12A -----  
At3g10310 VVDCILG ----- LKAYHECKLPSNGNG -----  
Os01g14090 IVDCVIS ----- LKSYHEWRQRGGSYG -----  
At1g63640 VLQSLKA ----- LKASFSDGSYDKNSL -----  
At5g41310 NT ----- LSARRRWSLPADHSK -----  
Os02g13580 LKT VKAEETQRIEDEDKYRII KEKDDALDRLVKEKEEMIRLLKEKDDVVRLMKEKEDLLN  
Os06g36080 VVTCLLA ----- LRDQFVSHDVGLSC ----- SLPEKV  
Os01g54080 IVECLLA ----- LKDNVATQLGGHISN -----  
Os05g44560 VVDCLLV ----- LRESVSSGLRDGTSK -----  
At1g18410 CCTKRAI ----- FCSSPGSSSHGGSTPR -----  
At1g73860 VVQEIERR ----- ISTQAEHLRTQNNIF -----  
Os11g44880 VVDCVLS ----- LRSFSESKQVGRSAP -----  
OsKCH1 VVDCVLA ----- LKSFSESNKTGRQAS -----  
Os03g18980 VVNCVLA ----- LKSYGDWKQCGGTGP -----  
At2g47500 VVNCVLA ----- IKSDEWKQSGGIGV -----  
At1g09170 IVECVLA ----- LKSYREWQKQSGSGT -----  
ATK4 IVNCILA ----- LKSYSEWKLKGENGP -----  
AtKP1 VVDCILC ----- LKGFYEWKQAGGVGV -----  
OsKCH2 VVDCILC ----- LKAYHEWKLSSGGIGI -----  
AtKCBP RDDAAQLCALQILVIGIFVNSPESCIDWTSLLERFLPRQIAI  
Os04g57140 RDDAAQLSALQILVEIGFVDNPESCVEWISLLERFLPRQVAI  
At1g55550 ----- SHMTSDWVKVSCNIA -----  
Os01g15540 ----- HLTSPWIESVSHII -----  
At5g27950 -----  
Os11g42800 ----- LEKLSLELNNGGIML -----  
ATK2 CADLEVN ----- LKVKEEELNMVIDEL -----  
ATK3 CVDMEVS ----- LKNKEEELNMIIEEL -----  
ATK5 YSKELD ----- AKTKEEELRATITEM -----  
ATK1 YNHKELE ----- ARTKEEELQATISKL -----  
Os03g64415 ----- TKSASSTGRVSRANP -----  
Os04g53760 AKLEAQ ----- LSSDLEELKAAHLNL -----  
Os07g01490 HSEIVAQ ----- LKSAIEESKAINNEEL -----  
At2g22610 VLDSE ----- LNISRDDYFEGGDVL -----  
Os03g02290 GCEPS ----- SKLSEDSFFEGGDAI -----  
At1g72250 STDVTVED ----- VTFLKDEFFSGGESI -----  
Os12g42160 ----- HRIAPLELFSGPSP -----  
At5g27550 ----- VEESEDITSGNQEV -----  
Os05g33030 LPQTPPR ----- LLLRSPNQIPNSAPP -----

Os06g11380 ----- QPVVGAAGMPLAPPTA -----  
AtKCA1 ----- KSSSNASFAES -----  
AtKCA2 -----  
AtKinesin-12A -----  
At3g10310 LYKHVKTPTFQLSATKIHPILSA -----  
Os01g14090 HLLKHLKSPLATRSASHV -----  
At1g63640 ----- AARRRWSLPEDHSDSRGDDRNFTDGFQSK -----  
At5g41310 -----  
Os02g13580 LEKGEVEGTTKMTDDNKDRLIKEKNDVVLRLTEEKEEMVRLLEKEDIIRLMKEKEDMVY  
Os06g36080 MMQSMFPRKENDPGTQNSGRRKIPKNPAMSEPSPL -----  
Os01g54080 ----- STAKTPIRRKLELRETDPVLSVATPGKR -----

Os05g44560 -----APLRKKWRVPEETGEP LVPGV AQGKTSF GED-----  
 At1g18410 -----SPFS PSSPREH NKGLADSR FQRPLFNSSALDPS-----  
 At1g73860 -----KTREEKYQSRIN VLEALASGTGVEHEIATQQL-----  
 Os11g44880 -----LKYGGILKPSMSGKHFIRKNSE P-----  
 OsKCH1 -----CKYGGLSKPLTARKYFILKNTDAF-----  
 Os03g18980 -----WKYGGNLKPSASGKSFVRKNSEPF-----  
 At2g47500 -----WKFGGNIKPPALGKSSFVRKNSE P-----  
 At1g09170 -----WRYILNSKPTTFGI AKQYKRKDSE-----  
 ATK4 -----WRYGSNMKHNFGSRKFLLRKSSEP-----  
 AtKP1 -----WRYGGTVRIVSFNRKGSS-----  
 OsKCH2 -----WRYGGIVKIASSSKRLPSYSSRGG-----  
 AtKCBP -----TRAKREWELDILARYRSMENVTKDDARQQF-----  
 Os04g57140 -----TRAKRDWELDIVSRYQLMEHLSKDDARQQF-----  
 At1g55550 -----  
 Os01g15540 -----  
 At5g27950 -----  
 Os11g42800 -----  
 ATK2 -----RKNFASVQVQLAKEQTEKLAANESLGKEREAR-----  
 ATK3 -----RKNFESVQVQLAREQTEKLAANDSLGKEREAR-----  
 ATK5 -----KENIESLQEKLSKEKLSKLDAIENHRRKDCR-----  
 ATK1 -----EENVVSLHEKLAKESSSTQDAIECHRREKEAR-----  
 Os03g64415 -----ASFHRPRLRLRQAGLHLRRPRL-----  
 Os04g53760 -----TRQCDLSLEESFNKEKADRMLAVESEYKERQQR-----  
 Os07g01490 -----QRQYASLEENLKRVEAEKLDALRSYGDEKEAR-----  
 At2g22610 -----RTEESIVEAGDFFFIYQSARVGNFCYQLNNL-----  
 Os03g02290 -----ETSEDIVEGGDYPSLYHSARYGNFSYKIDGL-----  
 At1g72250 -----TTDAVVGNEDILLYQTARLGNFAYKFQSL-----  
 Os12g42160 -----QGPPSPSPAIGGALEATSNDGV-----  
 At5g27550 -----  
 Os05g33030 -----RARRRKQIAAMEADPAPSSTPPSSPAPA-----

Os06g11380 -----  
 AtKCA1 -----  
 AtKCA2 -----KSPSSEEGVH-----  
 AtKinesin-12A -----  
 At3g10310 -----SKTSRHLDMSSVRE RNDCTD GESDKLKGIAK-----  
 Os01g14090 -----QSEYVCSGSSSTPKRLDLVETDTERQPQNQVGPNCQEAME-----  
 At1g63640 -----EGSEIDMSDAKISDLLKSNLSRNAPTRSLFDMLDKLLD-----  
 At5g41310 -----GVDSNFNDGGSQFIEASEINTSHHSLQNTSTRSLFD-----  
 Os02g13580 -----LEKGEVEDRKQMTDDIKDKLIKEKDDIVFRLTKEKEEIKLLEEKEDI IILMKEKEDMVN-----  
 Os06g36080 -----SQTTLSSISRHAGHSFHDVFLRQGRYS DLPSSKISEMMK-----  
 Os01g54080 -----YPKSQQRSPLLSGQKINEVVQFKHGTYTDLPAAKISEMLH-----  
 Os05g44560 -----KRNGLPDPKSQKTPIFNGRKLREIFQLKRGSYADLPAAKISEMMH-----  
 At1g18410 -----SPGSMHLHGKHSHEAFQMQG-----RFDLQAAKISELMK-----  
 At1g73860 -----RQIETEKSMWEEKKKHEEEDMVKLMKQNDQHNLEISALKQELE-----  
 Os11g44880 -----FVKTMVRSYSAEALLRDGVSLEQSLGLDFSLHEVERTTPDS-----  
 OsKCH1 -----MNKIMKGHSAEAIQSEFSEGGQSVTDFSIENEMTTSDS-----  
 Os03g18980 -----RRCQSMNEGEVPEEAGFSGDYHLDSGDMSTSRP-----  
 At2g47500 -----FMNSLRSRTSSINNEKAPSENDSNKLSPPSSLSTLVR-----  
 At1g09170 -----VPVDAVTNSPSSTPSSEQPLLDQSDNTKNDGTASSID-----  
 ATK4 -----FVSSISRTQSTDMLSTDQPLSSDGDSRSIN-----  
 AtKP1 -----PPQYIGSESTTDESVSLEDESSQYDQLLDFLHLSNEIS-----  
 OsKCH2 -----GSADLNQQMLEFVHLLSEVSLSESRVGESQH-----  
 AtKCBP -----LRILKALPYGNSVFFSVRKIDDP IGLLPGR IILGINKRGVHFFRPVPKEYLHSAEL-----  
 Os04g57140 -----LRILRTL PYGNSVFFSVRKIDDP IGLLPGR IILGINKRGVHFFRPVPKEYLHSAEL-----  
 At1g55550 -----  
 Os01g15540 -----  
 At5g27950 -----  
 Os11g42800 -----  
 ATK2 -----IAVESLQAAIT EELAKTQGE LQTANQRIQAVNDMYK-----  
 ATK3 -----LSVEKAQAGL TEELGKAQGD LQTANQRIQSVNDMYK-----  
 ATK5 -----VVAEKLQVSLREELDKVKEEKMAAKQKVTSL EDMYK-----  
 ATK1 -----VAAEKVQASLGEELDKVKEEKMAAKQKVTSL EDMYK-----  
 Os03g64415 -----SRQAGLRCHRHLHLSAPSRSP TPPPNAVAPSSCSRLP-----  
 Os04g53760 -----ESAEASLDLLSVDLERVSHAEAKRFSEQLKMQDTNK-----  
 Os07g01490 -----IAVEASRNEHLEDLRRIKLEEKRLNDQIKMLQDTNK-----  
 At2g22610 -----LPGEYLIDFHFAE IINTNGPKGIRVFNVYVQDEKATE-FD-----  
 Os03g02290 -----APGDYFLDLHFAEIVNTYGPKGIRAFDVLVQEEKILSELD-----  
 At1g72250 -----DPGDYFIDLHFAEIEFTKGPFG-----VISGLD-----  
 Os12g42160 -----AEPQVHPPEGISSIISTGGGEQETATMGSQSVHETLH-----

At5g27550 -----  
 Os05g33030 -----ASPSRHPPGEEGGGAERVEVEEYVDPSPDCCGGA-----

Os06g11380 -----  
 AtKCA1 -----  
 AtKCA2 -----R-----  
 AtKinesin-12A -----  
 At3g10310 -----LFADHIFSSKEN-----  
 Os01g14090 -----R-----LQKVILDCMISC  
 At1g63640 -----ESMTKMNGHVSH-----AMASLLSALVQVIEQRI  
 At5g41310 -----MLDRLLDESSQK-----MNVSHVYVSLRGIVQVVEQRI  
 Os02g13580 -----LGKGEDEDRKQADNDKDRLIKEKDDIVVRLTKEKEEIIKEKDDIVVRLTKEKEEIIKLL  
 Os06g36080 -----S-TSLDNAPTQS-----LLSVNVILDELVETKIGETIPY---HLACLLRKKVLEIERRI  
 Os01g54080 -----S-NSLDNAPTQS-----LLRVVNGILDESIERRKGEIPH---RVVHLLRNVIQIEHRI  
 Os05g44560 -----S-NSLDNAPTQS-----LLSVVNGILDESIERRKGEIPH---RVVYLLRKKVQIEERRL  
 At1g18410 -----S-NNLDNAPTQS-----LLSIVNGILDETIERRKNGELPQ---RVACLLRKKVQIEERRI  
 At1g73860 -----TTKRKYEQQYSQIESQTKTEKSKWEEQKNEEEDMDKLLKENDQFNLQISALRQLELTR  
 Os11g44880 -----I-RMLVQTM LSD-----KPEEIPV---LVESLLSRVIEHFERRT  
 OsKCH1 -----LSILLRKKVLLDK-----KPEEVPL---IVESILSKVIEYEHRI  
 Os03g18980 -----L-KMLVSAVLS-----KRPDEVPQ---LLESMLSKLVEEFENRL  
 At2g47500 -----AVLSDKKPEDVP-----KLIESLLSKVVEEFENRV  
 At1g09170 -----AIVRAVFSDMKQ-----EDIPV---IVEDMLKSMVEYERRL  
 ATK4 -----GLVRSFIADRKH-----EDIPN---VVESVLNKVMEEVQQR  
 AtKP1 -----A-EESETAISLAFLFDFHAFALQLLHGYLEKES--DGINDMPLNEMVIDTLLNRVVKDFSAIL  
 OsKCH2 -----SLFQQFVLRVVR-----AFLQEWGEAEGPLDDMVLETILEQACKFTILL  
 AtKCBP -----RDIMQFGSSNTAVFFKMRVAGVLHIFQFETKQGEIICVALQTHINDVMLRRYSKARSAAN  
 Os04g57140 -----RDIMQFGSSNTAVFFKMRVAGVLHIFQFETKQGEIICVALQTHINDVMLRRYSKARSATS  
 At1g55550 -----  
 Os01g15540 -----  
 At5g27950 -----  
 Os11g42800 -----  
 ATK2 -----L-LQEYNSSLQL-----YNSKLQGDLEAHENIKRGEKERTGIV  
 ATK3 -----L-LQEYNSSLQL-----YNSKLQGDLEAHETIKRGEKERTAI  
 ATK5 -----R-LQEYNTSLQQ-----YNTKLQTDLEVAREAHTRAEEKSSIL  
 ATK1 -----R-LQEYNTSLQQ-----YNSKLQTDLETVRAALTRAEEKSSIL  
 Os03g64415 -----RARLAIRRRAS-----SHSATVDTACSRRH  
 Os04g53760 -----R-LQEYNTSLQQ-----YNSNLQADASKSGDIIISKLQKEKSAMM  
 Os07g01490 -----R-LQEYNTSLQQ-----YNSNLQADATKNGETIAKLQKEKNTMV  
 At2g22610 -----I-FSVVGANRPLLLVDLVRVMDDGLIRVRFEGINGSPVVCGI---C  
 Os03g02290 -----V-YAVVGGNRPLQVRDIRVTVESDSAIVINFKGVGSPMVCGICIRKRVAMAVTDMVTEG  
 At1g72250 -----L-FSQVGANTPLVIEDLRLMVGREGELSLRLEGVTGAAILCGISIRKETATATVVEETGML  
 Os12g42160 -----I-----EENEGKC  
 At5g27550 -----  
 Os05g33030 -----

Os06g11380 -----MPRAPPTAMVARAAGADGAV--VPVADRLDQ-----  
 AtKCA1 -----TGHRTTGPLLRNRSISTPSL--PPKQAIASK-----  
 AtKCA2 -----TPSSMLRRYSIPKNSLP----PHSSELASK-----  
 AtKinesin-12A -----  
 At3g10310 -----IDENLV--SLENGSENSRANFEKILSRF--PELQSVFKN-----  
 Os01g14090 -----KENLDND--SLKKDPYKLVGTILSRQLEK--EQFPELLQL-----  
 At1g63640 -----SNQAD---NLKNQNILFRVREEKYRSRI--KVLES LAAG-----TTKENEIV  
 At5g41310 -----SNQAE---NLKNQNILFRVREEKYRSRI--NVLET LAG-----  
 Os02g13580 -----EEKEDII--SLMKQKEDMFMSIKEKENKA--ELKKIADED-----  
 Os06g36080 -----STQAE---HIRNQNNLMKAREEKYKRSI--RVLEALASGTSQTHVNSNATNGKAHVSP  
 Os01g54080 -----GIQAD---HIRNQNSIIKTREDKYRSKI--KALET LVNGTNEENEMAIN-----  
 Os05g44560 -----CIQAE---HIRSNVVIKTREDKYRSKI--KALEILVNG-----TNEENQMA  
 At1g18410 -----STQSE---HLRTQNSVFKAREEKYQSRI--KVLET LAG-----  
 At1g73860 -----KAYEQQCSQMESQTMVATTGLESRLKELEQEGKVNTAKN-----  
 Os11g44880 -----ANQNE---SVKHALDPNDKLLSRADTP--PEMESTCTC-----  
 OsKCH1 -----AIQNK-----  
 Os03g18980 -----TSQHE---LVKAALKNGTDGTSKFSKSK--VLVEATPNS-----  
 At2g47500 -----TNQYE---LVRAAPRESTSSQNRSFL--KPLGERERE-----  
 At1g09170 -----ATQNELLMSAGNRDKLGSGLGRITISGNEETLSDASYGE-----  
 ATK4 -----SIHNE---MMKSSSKPIPEDDSSCETVVRSQLCDARQHE-----  
 AtKP1 -----VSQGA---QLGSFLRKILKCDNGDLRS--EFLAAVFRY-----  
 OsKCH2 -----ASHRN---QVRSLLRKMMDENGAHSKQ--ELIEVISKS-----  
 AtKCBP -----SLVNGDI--SCSSKPNFVYKRLQDLS--KAYEESQKK-----  
 Os04g57140 -----AVSQNDV--SQTYKPPNIEIYEKRVQELS--KAVEESERK-----



Os06g36080 KEKEE---MVWMMREKENMVSLNNGRVEDKHQLTDKDVANSARYNEIIKLMKEKEDSN  
 Os01g54080 ETKAR-----  
 Os05g44560 ELTAK-----  
 At1g18410 ESKTKGATAGIEDRVKELEQMRKSDASVARKALEERVRELEKMGKEADAVKMNLEEKVKEL  
 At1g73860 QQMEK-----  
 Os11g44880 IQAKQ-----  
 OsKCH1 QLEAQ-----  
 Os03g18980 EAYGE-----  
 At2g47500 EKMKT-----  
 At1g09170 YAI SK-----  
 ATK4 -----  
 AtKP1 GKLEF-----  
 OsKCH2 KQLDD-----  
 AtKCBP QSLMS-----ELRGMEARLAK  
 Os04g57140 QASLM-----EKTRLETRLKS  
 At1g55550 -----  
 Os01g15540 DDNTE-----  
 At5g27950 -----  
 Os11g42800 -----  
 ATK2 ETLQA-----  
 ATK3 KTLQT-----  
 ATK5 QKLAG-----  
 ATK1 QKLSE-----  
 Os03g64415 VLLAE-----  
 Os04g53760 NTL SA-----  
 Os07g01490 HSL LA-----  
 At2g22610 TSANE-----  
 Os03g02290 DNIEQ-----  
 At1g72250 SEIQN-----  
 Os12g42160 GSLAF-----  
 At5g27550 -----  
 Os05g33030 PKLKQ-----

Os06g11380 -----  
 AtKCA1 -----  
 AtKCA2 -----  
 AtKinesin-12A -----  
 At3g10310 -----  
 Os01g14090 -----  
 At1g63640 -----  
 At5g41310 -----  
 Os02g13580 -----DVARLLTDKENNDSIISELKKELEETKRLHE  
 Os06g36080 DTIMKLNIELEAMKSSYEGTRILLDSKKKEVLQLLMDKESIEYIVSQLKQELAIERSHQ  
 Os01g54080 -----  
 Os05g44560 -----  
 At1g18410 QKYKDEITITVTTTSIEGKNRELEQFKQETMTVTTTSLEAQNRELEQAIKETMTVNTSLEAKN  
 At1g73860 -----  
 Os11g44880 -----  
 OsKCH1 -----  
 Os03g18980 -----  
 At2g47500 -----  
 At1g09170 -----  
 ATK4 -----  
 AtKP1 -----  
 OsKCH2 -----  
 AtKCBP SGNTKSS-----KETKSELAEMNQI--LYKIQKELEVRNKELVAVDNSKRL  
 Os04g57140 GQQQESSNRITGVSGNHFERDTPVTVNNSIEMLAKLEELKSCCKELDASKELSKKLT  
 At1g55550 -----  
 Os01g15540 -----  
 At5g27950 -----  
 Os11g42800 -----  
 ATK2 -----  
 ATK3 -----  
 ATK5 -----  
 ATK1 -----  
 Os03g64415 -----  
 Os04g53760 -----EL  
 Os07g01490 -----  
 At2g22610 -----  
 Os03g02290 -----

At1g72250 -----  
 Os12g42160 -----  
 At5g27550 -----  
 Os05g33030 -----  
  
 Os06g11380 -----YSNAKL  
 AtKCA1 -----YSNAKL  
 AtKCA2 -----YSNAKL  
 AtKinesin-12A -----SKPPRKL  
 At3g10310 -----KTKCNHKRLL  
 Os01g14090 -----NRRRL  
 At1g63640 -----KTRDELEKLLKDAELHVVDSRKRKVELEKLCQSKSQRWKKECIYQNF  
 At5g41310 -----KAKVELERQVKNSLRVVEAKELEKLCETKTKRWKKEQTYKRF  
 Os02g13580 AHSQQLKAAQVSKLEQRIEEVKMLDDSTKRRIELEELSETRIQWKKKEVVIDQFV  
 Os06g36080 THIQELETRAFQANNKLEQRIRKEMELMLEDSTKTRVRDLEELLESRSQIWEQKEIRLNQFI  
 Os01g54080 -----QMEEHLTLRAKEAEFCLMQSKKKVEEVEATSQLKSQVWKKANIFQSF  
 Os05g44560 -----QMEEHLTKIKEVESLLVQSNKKEEVEAASLLKSQVWKKKEGIFQKYM  
 At1g18410 RELEQSKKETMTVNTSLKAKNRELEQNLVHWKSKAKEMEKSELNRSWSQKELSYRSFI  
 At1g73860 -----ETKTANTSLEGKIQELEQNLVMWKTKVREMEKSESNHQRSQKELSYKRFI  
 Os11g44880 -----TDKYF  
 OsKCH1 -----TNF  
 Os03g18980 -----VTLKQYSML  
 At2g47500 -----RQFKQLTIF  
 At1g09170 -----EKTEKQQLII  
 ATK4 -----QKIL  
 AtKP1 -----SRLNAREFSPGHVEAI  
 OsKCH2 -----GGGL  
 AtKCBP SENKILEQNLN-IEKKKKEEVEIHQKRYEQEKVKLKRVSLENKLEVLAQDLDSESTI  
 Os04g57140 MENNLLDQKVQRLERAKSEKSNMERVYEDECCKLKSRIAELEQKLESRTSLNVTSTL  
 At1g55550 -----KNTSS  
 Os01g15540 -----SEAKV  
 At5g27950 -----ESNQLEKSI  
 Os11g42800 -----NHDKDI  
 ATK2 -----EATKQNDFKDTINELESKCSVQNKFI  
 ATK3 -----EATKYNDFKDAITELETTCSSTQGI  
 ATK5 -----EILMYKESVKGSSHELDILIAKSGSLEETCSLQKERI  
 ATK1 -----EIRKYQENVGKSSQELDILTAKSGSLEETCSLQKERL  
 Os03g64415 -----VARETTGYSNGAPDPAAVVAISCCRPFSI  
 Os04g53760 ANYKELAGKSTKDCESLSVKVSAFEVSGFRLTKSILSVRNLAHHYASAQETCSMQEQI  
 Os07g01490 -----DVSTYKEMTGKVAELDNAMTRSTALEETCSQAERI  
 At2g22610 -----QLEKVMMELENNKIYQARSLDQTVITQADCLKSIIRKYENDKRHWATAIDSLQEKI  
 Os03g02290 -----VVDRAQDLRSVSQKYENAKKLWAAAIISNLENKI  
 At1g72250 -----ELMRKSMHVGSLAFAVEGQVKEKSRWFSSLRDLTRKL  
 Os12g42160 -----AVEGQVKEKSRWCQLLNDLSEKF  
 At5g27550 -----SDKI  
 Os05g33030 -----

Os06g11380 GRVTRYLGLFLADRTRKLDQ-----AALETEARITPLIHEK  
 AtKCA1 DRVTRYLGLVLAEKSRKLDQ-----FVLETEARISPLINEK  
 AtKCA2 ERVTRYLGLVLADKSRKLDQ-----YALETEARISPLINEK  
 AtKinesin-12A RSAKENAPPLDRNTSTPDHRSMRMKNPLPPPPSNPLKRKLS-AETATESGFS-----  
 At3g10310 KTQEKELAVLKNLFIKTKQ--DFKFEQVYLRQDLMELGNQMQ-EMSSAAQGYKVVVEEN  
 Os01g14090 QAQSELELELKSMSFQEVKI--DFRTLKTQFQDDIIKLGDNVQ-GLSKAALGYNQAVKEN  
 At1g63640 DNHSGALQELSATSLSIKH--EVRTQRKYFEDLNYYGLKLLK-GVADAAKNYHVVLEEN  
 At5g41310 NHQTEALQELKATSMKSLK--DVLKIGENYFLDLTYYGIKLR-GVAHAAKNYQIIIEEN  
 Os02g13580 SLQVQNVQDLKLSVSVRH--EILNCQNKWSEELAGLGKSLK-VVTNTAEKYHGALAEN  
 Os06g36080 GLQIQNIQDLRLSSVSIH--EILHCQKRWSEECDLGQSLK-VLTNAAENYHATLEEN  
 Os01g54080 NNQKLSIKDIKISSQSIKQ--EMYALQMTWRDEISNIGHDLK-GLVDAENYHKVLAEN  
 Os05g44560 NQQQLYVKGLRISWSIKN--EMHALEMELRDEMSNFGSLK-CLVDAENYHKVLAEN  
 At1g18410 SFQCQALQELRFYSKSIKQ--EILKVQDKYTVFESQLGKLL-ELGDAANYHEVLTEN  
 At1g73860 DNQSQALLELRSYSRSIKQ--EILKVQENYTDQFSQLGKLLI-ELSNAAENYHATLEEN  
 Os11g44880 DQQQKHIDKLSNLTAMKS--GMEHIKLYSEDLKLGKHHVH-TLSHAASGYHKVLEEN  
 OsKCH1 DVQKQIQELKALSFKS--GMEQLRLQYSEEFKALGHFY-TLSNAASSYHKVLEEN  
 Os03g18980 QLQSKHVEELKADIRATKA--GMEFMQMKYSEDINILGRHLF-SLAHAASGYHIVLEEN  
 At2g47500 NQQQEDIEGLRQTLTYTTRA--GMQFMQKQFQEEFSSLMGHVH-GLAHAASGYHRVLEEN  
 At1g09170 ERQQTHTEELKHDLKAVKA--GLSLLQMKYQEFSTSLGKHLH-GLTYAATGYQRVLEEN  
 ATK4 LNQQKHIQELKQTLTYTTKA--GMKLLQMKYQEDFFHLGKHLN-GLAYAATGYKRVLEEN  
 AtKP1 GLQQKELEEVKSNFVETRS--QVKMQSEWQKELQRIVHHVK-AMEVTSSSYHKVLEEN  
 OsKCH2 EHQQEELKLVSNEMKLL--QVESTSQWEEDLRRLLESYFE--AHNHNAYHKVLEEN

AtKCBP ESKNSDMLLQNNLKELEE-LREMKEIDRKNEQTAAILKMQGAQLAELEIILYKEEQVLR  
Os04g57140 ALRNAEVDLTLQNSLKELEDE-LREFKADVDRKNQQTAEILKRQGAQLIELENLYKQEQVLR  
At1g55550 TSKKEEDDFVSVDLQSIIRD-----QLSALTVQVNDQNKLR  
Os01g15540 QKIQDELVSLNAQLKQITL-----QR  
At5g27950 SNLEEEVFLKLLKLSLDE-----KR  
Os11g42800 SALQEEISALRSRQRHLHD-----RR  
ATK2 EELQDQLVASERKLVQVADL---STFEKMFEEQKESIMELKG-RLEEAELKLIERGEKLR  
ATK3 RQLQDRLVNSERRLQVSDL---STFEKMFEEQKQSIIDLKS-RVEEAELKLVGEKLR  
ATK5 KMLEQELAFAKEKLMVDL---SMSHTMTEFEEQKQCMHELQD-RLADTERQLFEGELLR  
ATK1 NMLEQQLAIANERQKMADA---SVSLTRTEFEEQKHLLCELQD-RLADMEHQLCBEGELLR  
Os03g64415 PPSTAAAGSCRHPAAVTRWRPLAGGARSGRRDNRPRQGTGAT-RTGISKTYVSSVVAKT  
Os04g53760 QTLTKQLAVATNKLKLDV---TAIEAMTGYEEQKVIKDLLE-RLASAEFQIVADKLR  
Os07g01490 KTLLEQLASANEKLRSDL---TMMETMTEYEQKRMLEDLQL-RLEEAQQIILDGENLR  
At2g22610 EIMKREQSLSQEAHECEVGEPIPELYKMVGQVQALVS-----QCEDLKQKYSEEQAKR  
Os03g02290 KAMKQEQTLLEAHDCANAVPDLKMIQAVQTLVA-----QCEDLKLKYYEEMAKR  
At1g72250 KIMKVEQIKLLEAATYKHLVQDINEFSSHIQSRVKQDAELHE----NLKVKFVAGEKER  
Os12g42160 KALKAHQILLQESLECKKQVADATQMTTIIQQHVNYASLEC-EFKDLKEKFTETKER  
At5g27550 KILKDEHALVSNQVQEIKN---CSLVEPEISRALQLLTT---KLGALEKQYLEESSER  
Os05g33030 -----INTPDRLAALRFLGGKYNLSLEERYKQVAKCAEBCAPRYDGLKKKYADECAER

Os06g11380 KRLFNDDLTLKGNVVFCSRPLFEDE----GSSVVE-FPDDFTIRVNTGDESITN-PK  
AtKCA1 KRLFNDDLTAKNIKVFCRARPLFEDE----GPSVIE-FPGDCTICVNTSDDTLNS-PK  
AtKCA2 KRLFNDDLTKGNVVFCSRPLFEDE----GPSVIE-FPDNCTIRVNTSDDTLNS-PK  
AtKinesin-12A -----SGVKVIVRMKPLNKG-----EGDMIVEKMSKDSLTVSG  
At3g10310 RKLNYMVDLQGNIRVYCRVRFINSEM---DGVVDY-IGKDGSLFVLDPSPKPKD-AR  
Os01g14090 KSLYNLLQELRGNIRVFCRIRPLINSE---ISSIEH-IGNDGSIMVCDPLKPKT--TR  
At1g63640 RRLYNEVQELKGNIRVYCRVRFPLPGQNS-R-QTTIEY-IGETGELVVANPFKQKGD-TH  
At5g41310 RRLYNEVQELKGNIRVYCRVRFPLPGQNK-K-QTSIEY-TGENGELVVANPLKQKGD-TY  
Os02g13580 RKLFEIQELKGNIRVYCRVRFPLPGEDD-K-SSSVEY-IGDNGELVLSNPTKQKKE-GG  
Os06g36080 RKLFEVQELKGNIRVHCRVRFPLPGEDQ-T-STTIEY-VGDNGELILANPAKRKKE-GH  
Os01g54080 RKLNYNEVQELKGNIRVYCRVRFPLPGQDG-K-LTAIDY-IGENGEILIANPSKQKKE-GY  
Os05g44560 QKLFNEVQELKGNIRVYCRVRFPLPGQDK-K-STVDY-IGENGELLSNPFKQKGD-GH  
At1g18410 QKLFNEVQELKGNIRVYCRVRFPLPGQGA-S-KTVVEH-IGDHGELVVLNPTKPGKD-AH  
At1g73860 RKLFEVQELKGNIRVFCRVRPFLPAQGA-A-NTVVEY-VGEDGELVVNPTKPGKD-GL  
Os11g44880 RKLNYNEVQELKGNIRVYCRVRFPLPGQV---SSSSVA-GLEDRITITVMTSPKHKGD-AR  
OsKCH1 RKLNYNEVQELKGNIRVYCRVRFPLPGHRS---LSSSVA-DTEERTITITPTKYGKD-GC  
Os03g18980 RKLNYNEVQELKGNIRVYCRVRFPLPGQV---SSCAVG-SIDENITITITPSKSGKE-GR  
At2g47500 RKLNYNEVQELKGNIRVYCRVRFPLPGQSS---FSSTIG-NMEDDTIGINTASRHGK--SL  
At1g09170 RKLNYNEVQELKGNIRVYCRVRFPLPGQKS-V-LTTVDH-L-EDSTLSIATPSKYGKE-GQ  
ATK4 RKLNYNEVQELKGNIRVYCRVRFPLPGQESGG-LSAVED-I-DEGTITIRVPSKYGKA-GQ  
AtKP1 RLLYNEVQDLKGTIRVYCRVRFPLQEQD-M-QSTVDY-IGENGEIINNPFKQEKD-AR  
OsKCH2 RKLNYNEVQDLKGSIRVYCRVRFPLKMQTD-Q-RSTVDH-IGENGEIMIVNPQKQKKE-GR  
AtKCBP KRYLNTIEDMKGKIRVFCRIRPLNEKES---EREKQM-LTTVDFETVHPWKDD---KR  
Os04g57140 KRYLNTIEDMKGKIRVFCRIRPLNDKELI---EKDKNI-VCSPEFETVAHPWKDDKS---  
At1g55550 RQILNEFLDLKGNIRVFCRVPKPLGATEKL---RPPVAS---DTRNVIKLSSET-----KR  
Os01g15540 REALNLYDLKGNIRVFCRIRPFHHEESY---SSRNLF-TLDESNVFLKVAET-----KR  
At5g27950 KQVNLKIIDTKGSIRVFCRVRPFLTEREPI-REPVSF-GPDNVVIRSAG-----SS  
Os11g42800 QEALDKLIDLKGSIRVFCRVRPSISANNF---MTKSPV-TVENEKIVVRAVG-----IK  
ATK2 KKLHNTIQELKGNIRVFCRVRPLPSGENSSE-EAKTIS-YPTSLEALGRGIDLLQNG-QS  
ATK3 KKLHNTIILELKGNIRVFCRVRPLPSGENNGD-EGKTIS-YPTSLEALGRGIDLMQNA-QK  
ATK5 KKLHNTIILELKGNIRVFCRVRPLPDDGGRQ-EASVIA-YPTSTESLGRGIDVVQSG-NK  
ATK1 KKLHNTIILELKGNIRVFCRVRPLPDDGGRH-EATVIA-YPTSTEAQGRGVDLVQSG-NK  
Os03g64415 LAL---QELKGNIRVFCRVRPLPNE-----SGAVAY--PKSGENLGRGIELTHNG-QM  
Os04g53760 KKLHNTIILELKGNIRVFCRVRPLPQDNDSSGAEEALIS-YPTSVEASGRGIDLMNQG-QR  
Os07g01490 KRLHNTIILELKGNIRVFCRVRPLPNE-----SGAVAY--PKSGENLGRGIELTHNA-QM  
At2g22610 KELYNHIQETKGNIRVFCRPLNTEETS---TKSATI-VDFDGAQDGLGVIITGNN-SK  
Os03g02290 KKLHNIVEETKGNIRVFCRPLSKDETS---SGYKCA-VDFDGAQDGLGIAIVNGGA-AK  
At1g72250 KELYNKILELKGNIRVFCRPLNFEETE---AGVSMG-IDVESTKNGEVIVMSNGF-PK  
Os12g42160 KDLYNKILIEVKNIRVFCRPLNQEIEGASMAVDPESAKDGLIVRGHVS-----SK  
At5g27550 KRLYNEVIELKGNIRVFCRPLNQAIEIANG-CASVAE-FDITQE--NELQILSSDS-SK  
Os05g33030 RRLYNEVIELRGNIRVFCRPLSTAIEISNG-CSSIVQ-IDPSHE--TELQFVPSDK-DR

. : . \* \* . \*

Os06g11380 KDYEFDRVYGPPIGQELFHDV-QPLVQSALDGYNVAIFAYGQSRSGKTHTEGSSH---  
AtKCA1 KDFEFDRVYGPVHQAALFSDV-QPFVQSALDGSNVSILSYGQTNAGKTYTMEGSNH---  
AtKCA2 KEFEFDRVYGPVQQAALFSDV-QPFVQSALDGSNVSIFAYGQTHAGKTYTMEGSNQ---  
AtKinesin-12A QTFTFDSIANPESTQEQMQLVGAFLVENCLSGFNSSVFAYGQTGSGKTYTMTWGPANGLL  
At3g10310 KTFQFNQVFGPTATQDDVFRET-QPLIRSVMDGYNVCIFAYGQTGSGKTYTMTSGPPGR-S  
Os01g14090 KIFQFNKIFGPTTTQDEVYKET-QYLIRSVMDGYNVCIFAYGQTGSGKTHTMCGPSSGLS  
At1g63640 RLFKFNKVFDAQAATQEEVFLDT-RPLIRSVMDGYNVCIFAYGQTGSGKTYTMTSGPSIT-S

At5g41310 RLFKFNKVFPESTQEEVFLDT-RPMIRSVLDGYNVCFAYGQTGSGKTYTMSGP SIT-S  
Os02g13580 KNFTFNKVFPIITQDAVFKDI-QPLIRSVLDGYNVCFAYGQTGSGKTYTMMGPEKA-T  
Os06g36080 KLFKFNKVLGPSASQDEVFKEI-QPLIRSVLDGYNVCFAYGQTGSGKTYTMTGPENA-T  
Os01g54080 RMFKFNKVFTHSSQAEVFSDI-QPLIRSVLDGFNVCFAYGQTGSGKTYTMSGPGTS--  
Os05g44560 RMFKFNKVFSPFSSQAEVFSDI-QPLIRSVLDGFNVCFAYGQTGSGKTYTMSGPSTS--  
At1g18410 RKFRFNKVYSPASTQAEVFSDI-KPLIRSVLDGYNVCFAYGQTGSGKTYTMTGPDGA-S  
At1g73860 RQFKFNKVYSPASTQAEVFSDI-RPLVRSVLDGYNVCFAYGQTGSGKTYTMTGPDGS-S  
Os11g44880 KSFTFNRVFGPLATQEQVFADM-QPLIRSVLDGYNVCFAYGQTGSGKTYTMSGPKVL-T  
OsKCH1 KSFSFNRVFGPASTQEEVFSDM-QPLIRSVLDGFNVCFAYGQTGSGKTYTMSGPKVL-T  
Os03g18980 KTFNFKVFGPSATQEEVFLDT-QPLIRSVLDGYNVCFAYGQTGSGKTYTMSGPKNM-T  
At2g47500 KSFTFNKVFGPSASQEAVFADM-QPLIRSVLDGYNVCFAYGQTGSGKTYTMSGPRDL-T  
At1g09170 KTFNFKVFGPSASQEAVFADT-QPLIRSVLDGYNVCFAYGQTGSGKTYTMMGNEL-T  
ATK4 KPFMFKVFGPSATQEEVFSDM-QPLVRSVLDGYNVCFAYGQTGSGKTYTMTGPKEL-T  
AtKP1 KIFSNKVFQGTVSQEQIYIDT-QPVIRSVLDGFNVCFAYGQTGSGKTYTMSGPDLM-T  
OsKCH2 KMFSFNKIFGNASQSEVFADT-QPLIRSVMDGYNVCFAYGQTGSGKTYTMSGPDIT-T  
AtKCBP KQHIYDRVFDMRASQDDIFEDT-KYLVQS AVDGYNVCFAYGQTGSGKTYTIIYGHE----  
Os04g57140 KQHIYDRVFDANTQEEVFEEDT-KYLVQS AVDGYNVCFAYGQTGSGKTYTIIYGSE----  
At1g55550 KTYNFDKVFQPDSSQDDVFELEI-EPVIKSVLDGYNVCFAYGQTGSGKTYTMEGLP----  
Os01g15540 KQYKFDKVFQDFSTQGVFSEV-EPVIKSVLDGYNVCFAYGQTGSGKTYTMEGKP----  
At5g27950 KEFFFDKVFHQSATQEEVFEV-EPVIRSVLDGYNVCFAYGQTGSGKTYTMDGTS----  
Os11g42800 KEFSDRVFDQESTQEDVFEV-EPVIRSVLDGYNVCFAYGQTGSGKTYTMEGNN----  
ATK2 HCFTFDKVFPASQEDVFEI-SQLVQSALDGYKVCIFAYGQTGSGKTYTMMGRPGN--  
ATK3 HAFTFDKVFAPTASQEDVFEI-SQLVQSALDGYKVCIFAYGQTGSGKTYTMMGRPGN--  
ATK5 HPFTFDKVFHDGASQEEVFEI-SQLVQSALDGYKVCIFAYGQTGSGKTYTMMGRPET--  
ATK1 HPFTFDKVFNHEASQEEVFEI-SQLVQSALDGYKVCIFAYGQTGSGKTYTMMGRPEA--  
Os03g64415 YFFTFDKVFEQSTQEDVFEI-SHLVQSALDGYKVCIFAYGQTGSGKTYTMMGNPEL--  
Os04g53760 YFSYDKVFDHGASQEDVFEV-EPVIRSVLDGYNVCFAYGQTGSGKTYTMMGPPG--  
Os07g01490 YSFTFDKVFHQSATQEDVFEI-SQLVQSALDGYKVCIFAYGQTGSGKTYTMMGNPEL--  
At2g22610 KSFKFDRVYTPKDGQDVDFADA-SPMVSVLDGYNVCFAYGQTGSGKTYTMEGTP----  
Os03g02290 KTFKFDKVFQPDSSQDDVFELEI-EPVIKSVLDGYNVCFAYGQTGSGKTYTMEGTE----  
At1g72250 KSFKFDSVFGPNSQADVFEDT-APFATSVLDGYNVCFAYGQTGSGKTYTMEGTQ----  
Os12g42160 KVFKFDSVFPEDQEKVFEKT-VPFATSVLDGYNVCFAYGQTGSGKTYTMEGIE----  
At5g27550 KHFKFDHVFQPDGQETVFAQT-KPIVTSVLDGYNVCFAYGQTGSGKTYTMEGTP----  
Os05g33030 KAFKFDHVFQPDGQETVFAES-LPVVRSVMDGFNVCFAYGQTGSGKTYTMEGIP----  
. : : \* :: . . : \* : . : : \* : : \* : \* : \*

Os06g11380 -----DRGLYLRSFEELFDLNSDST---TSTSHFNFYITACELYNDQVRDLLSDSI-  
AtKCA1 -----DRGLYARCFEELFDLANSDS---TSTSRFSFSLSVFEIYNEQIRDLLSETQ-  
AtKCA2 -----DRGLYARCFEELMDLANSDS---TSASQFSFVSVFELYNEQVRDLLSGCQ-  
AtKinesin-12A EEHLGCDQRGLTPRVFERFLRKEEQVKAERQLNYQCRCSLEIYNEQITDLDLPSQ-  
At3g10310 AT----EMGINYLALSDLFLICDR-R----KMMTYEIVVQMVVEIYNEQVRDLLAENS-  
Os01g14090 SQ----DLGISYMALNDLFKTTST---REDVKYDIHVQMVVEIYNEQVRDLLNEDT-  
At1g63640 KE----DWGVNRYALNDLFLLTQS-R---QNTVMYEVGVQMVVEIYNEQVRDILSDGG-  
At5g41310 EE----DRGVNRYALNDLFLLTQS-R---QNSVMYEVGVQMVVEIYNEQVRDILSDG--  
Os02g13580 EK----EWGVNRYALNDLFNISHD-R---RDTITYELGVQMIYNEQIRDLLGSGG-  
Os06g36080 EK----DWGVNRYALNDLFLHISRS-R---RDTVMYKVSQMIYNEQIHDLLGNSG-  
Os01g54080 RE----DWGVNRYALNDLFLDISLS-R---KNAFSYEVGVQMVVEIYNEQVRDILSNDI-  
Os05g44560 KE----DWGVNRYALNDLFLDISLS-R---RNAFSYEVGVQMVVEIYNEQVRDILSNDI-  
At1g18410 EE----EWGVNRYALNDLFRISQS-R---KSNIAEYEVGVQMVVEIYNEQVRDILS--  
At1g73860 EE----DWGVNRYALNDLFLKISQS-R---KGNISYEVGVQMVVEIYNEQVLDLSDDN-  
Os11g44880 EE----GLGVNRYALNDLFLNIQAQ-R---KDTFCYEISVQMIYNEQVRDILQNGG-  
OsKCH1 EE----SLGVNRYALNDLFLNIKAQ-R---KGTIDYEISVQMIYNEQVRDILQDGG-  
Os03g18980 EQ----TQGVNRYALSDLFLKLAEQ-R---KGAFIYDIYAVQMIYNEQVRDILVNDG-  
At2g47500 EK----SQGVNRYALGDLFLFLAEQ-R---KDTFRYDIYAVQMIYNEQVRDILVTDG-  
At1g09170 DE----TLGVNRYALSDLFLHLSK-----  
ATK4 EE----SLGVNRYALADLFLFLSNQ-R---KDTTSYEISVQMIYNEQVRDILLAQDG-  
AtKP1 ET----TWGVNRYALRDLFLQLSNA-R---THVVTYEIGVQMIYNEQVRDILVSDG-  
OsKCH2 EE----TWGVNRYRSLNDLFAISQN-R---ADTTYDVKVQMIYNEQVRDILMVDG-  
AtKCBP -S-----NPGLTPRATKELFNILKR-D---SKRFSSFLKAYMVELYQDTLVDLLPKS-  
Os04g57140 -N-----NPGLTPRATKELFRVIKR-D---GHKYSFSLKAYMVELYQDNLDLAKN-  
At1g55550 -N-----SPGIVPRAIKGLFQVVEE-----SNHMFTIHFMSLEIYMGNLKDLLSEA-  
Os01g15540 -T-----NLGVIIPRGIQTLFNQASE-----CNNRFLTFMSLEIYMGNIIRDLLAPRS-  
At5g27950 -E-----QPLAPRAIKELFNEASM-----DQTHSVTFRMSLEIYMGNLKDLLSARQ-  
Os11g42800 -G-----KLGIVPRAIQELFSSHASQ-----DSSSTYSFISMSLEVYMGTVRDLTPRQ-  
ATK2 PD----EKGLIPRCLEQIFQTRQSLR----SQGWKYELQVSMLEIYNETIRDLLSTNK-  
ATK3 VE----EKGLIPRCLEQIFETRQSLR----SQGWKYELQVSMLEIYNETIRDLLSTNK-  
ATK5 PE----QKGLIPRSLEQIFKTSQSLR----TQGWKYKMQVSMLEIYNETIRDLLSTNK-  
ATK1 PD----QKGLIPRSLEQIFQASQSLG----AQGWKYKMQVSMLEIYNETIRDLLSTNR-  
Os03g64415 HD----QKGLIPRSLEQIFQTSQALI----SQGWKYKMQASMLEIYNETIRDLLATNH-  
Os04g53760 RD----QKGIIPRSLEQIFKTSQSLR----SQGWKYSMQASMLEIYNETIRDLLAPGR-  
Os07g01490 HD----QKGLIPRSLEQIFQTSQALI----SQGWKYKMQASMLEIYNETIRDLLATNR-

At2g22610 -Q----NRGVNYRTVEQLFEVARE-R----RETISYNISSVSVLEVYNEQIRDLLLATSP-  
Os03g02290 -R----NRGVNYRTLEELFKIAEE-R----KETVTYSISVSVLEVYNEQIRDLLASSP-  
At1g72250 -H----DRGVNYRTLENLFRIKA-R----EHRYNYEISVSVLEVYNEQIRDLLVPAS-  
Os12g42160 -D----ARGVNYRTLEELFRITKE-R----QGLFQYEITVSVLEVYNEQIHDLTGT-  
At5g27550 -E----NRGVNYRTLEELFRCSSE-K----SHLMKFELSVSMLEVYNEKIRDLLVDNS-  
Os05g33030 -E----DRGVNYRALEELFRLEE-R----SSSVAYTFAVSILEVYNEKIRDLLDESS-

\*:           ::

Os06g11380 -----SPVPKVRMGVQE-----SFVELVQEKVENPLEFSNSLKAALENRSANS  
AtKCA1 -----SNLPNINMDLHE-----SVIELGQEKVDNPLEFLGLVKSFAFLNRGNKY  
AtKCA2 -----SNLPKINMGLRE-----SVIELSQEKVDNPEFMRVLSNFAQNRNDK  
AtKinesin-12A -----KNLMIRE-DV-KSGVYVENLTEEYVKNLTDVSQLLIKGLGNRRRTGA  
At3g10310 -----SCTRLDIRTCSSDDGLSLPDATMHSVNSTKDVQLMEAGEVNRVAVSS  
Os01g14090 -----SSTKLDIRT-SS-NGLNLNLPDAKKCPVQSPSDVINLMLLGEKHRASSP  
At1g63640 -----SSRRLGIWN-TALPNGLAVPDASMHCVRSTEDVLELMNIGLMNRTVGA  
At5g41310 -----VPDASMHSVRSTEDVLELMNIGLMNRTVGA  
Os02g13580 -----VQKGLGIQN-TIQPNGLAVPDATMCPVTSTSHVIELMQTGHDRAMSA  
Os06g36080 -----SEKKGILN-ASQPNGLAVPDATMHPVNSSSDVIELMRTGLENRSVGA  
Os01g54080 -----AQKRLGIWS-TSQPNGLVVPDASLHPVKSTSDVLDLMEIGQSNRAVGS  
Os05g44560 -----AQKRLGIWS-TSQPNGLVVPDASLHPVKSTSDVLDLMEIGQSNRAVGS  
At1g18410 -----GILS-TTQQNGLAVPDASMPVPTSTSDVLELMSIGLQNRVVS  
At1g73860 -----SQKTLGLILS-TTQQNGLAVPDASMPVPTSTSDVITLMDIGLQNRVVS  
Os11g44880 -----NKKVDIKN-SS-QKGIAPDANIVPVTSTSDVIDLMLNGQKNRAVCS  
OsKCH1 -----NRRLEIRN-TP-QKGLAVPDASIVPVTSTADVVELMNGQKNRAVGS  
Os03g18980 -----LNKRLEIRN-NS-QNGLNVPDASLVCVASTMDVMELMNVGQKNRAVGA  
At2g47500 -----SNKRLEIRN-SS-QKGLSVPDASLVPVSSTFDVIDLMDTGHKNRAVGS  
At1g09170 -----IRN-ST-QDGINVPEATLVPVSTSDVIHLMNIGQKNRAVSA  
ATK4 -----QTKRLEIRN-NS-HNGINVPEASLVPVSSDDVVIQLMDLGHMNRVSS  
AtKFP1 -----SSRRLDIRN-NSQLNGLNVPDANLIPVSNTRDVLDLMRIGQKNRAVGA  
OsKCH2 -----ANKRLEIRN-SSHVNGLNIPDANLVPVKAQDVLDLMRVGHNRRAVGS  
AtKCBP -----ARRLKEIKK-DS-KGMVFNVTIPISTLEELRMILERSGERRHVS  
Os04g57140 -----ATHQKLEIKK-DS-KGVVTVENVTVVNISSFEELRAIILRGSERRHTAG  
At1g55550 -----TKPISPIPPSLSIHT-DP-NGEIDIENLVKLVDDFNEILRLYKVGCRSRATAS  
Os01g15540 -----KTNGIKNVPSLSIKS-DP-DGGIEIEDLVAVTVNSFQEVKRLYEMGTRLRSTAS  
At5g27950 -----SLKSYEASAKCNLNIQV-DS-KGSVEIEGLTEVEVMDFTKARWVYKGRVRSTSW  
Os11g42800 -----PLFRSTECNTSSIIISILA-TK-SGAVEVEGLTDVAIQDLKKANQVYCRGRARRSTSW  
ATK2 -----EAVRADNGVSPQKYAIKH-DA-SGNTHVVELTVVDVRSKQVFFLDHAARNRSVKG  
ATK3 -----EAVRTDSGVSPQKHAIKH-DA-SGNTHVAELTILDVKSREVSFLDHAARNRSVKG  
ATK5 IAIESVRADSSSTSGRYTITH-DV-NGNTHVSDLTIVDVCSIGQISSLLQQAQSRVSGK  
ATK1 TSMDLVRADSGTSGQYTIH-DV-NGNTHVSDLTIFDVCSVGISSLLQQAQSRVSGK  
Os03g64415 -----TTIQDGGASKYSIKH-DA-NGNTHVSDLIIVDVLSINEVSSLLKRAAQSRVGR  
Os04g53760 -----SNNFDLSTSKQYTIKH-DP-QGNTTVDLTVADVFSADVTSLLAKASQSRVGR  
Os07g01490 -----TTVQDGGASKYSIKH-DA-NGNTHVSDLTIVDVSSINEVSSLLKRAAQSRVGR  
At2g22610 -----GSKKLEIKQ-SS-DGSHHVPLVEANVENINEVWVNLQAGSNARAVGS  
Os03g02290 -----SSKKLEIKQ-AS-EGSHHVPGIVEAKVENIKEVVDVLQAGSNARAVGS  
At1g72250 -----QSASAPKRFEIRQ-LS-EGNHVPLVEAPVKSIEEVVDVLKTGSNARAVGK  
Os12g42160 -----QPGATAKRLEVRQ-VA-EGVHHVPLVEARVTNMNEAWEVLQTGSKARVVS  
At5g27550 -----NQPPKKLEVKQ-SA-EGTQEVPLVEAQVYNTDGVWDLKKGAVRSVGS  
Os05g33030 -----EQTGRKLDIKQ-TA-DGTQEVAGLIEAPIYITIDGVWEKLVGAKNRVGA

: \*

Os06g11380 LKVMVS----HLIVTIHI--HYRNYVTG-EHLY-SKLSLVLDLPASECLLEEDANRDNVTD  
AtKCA1 SKFNVT---HLIVSIHI--YYSNTITG-ENIY-SKLSLVDLAGSEGLIMENDSGDHVTD  
AtKCA2 S----KSTVTHLIVSIHI--CYSNTITR-ENVI-SKLSLVDLAGSEGLTVEDDNGDHVTD  
AtKinesin-12A TSVNTESSRSHCVFTCVVESRCKNVADGLSSFKTSRINLVDLAGSERQKSTGAAGERLKE  
At3g10310 TSMNRRSSRSHSIFMVHV--RGKDT-SG-GTLR-SCLHLVDLAGSERVDKSEVTGDRLKE  
Os01g14090 TAMNHRSSRSHSILTVHV--NGKDM-SG-NVTR-SSLHLVDLAGSERVDRSEATGDRLKE  
At1g63640 TALNERSSRSHCVLSVHV--RGVDVETD-SILR-GSLHLVDLAGSERVDRSEATGERLKE  
At5g41310 TTLNEKSSRSHSVLSVHV--RGVDVETE-SVLR-GSLHLVDLAGSERVGRSEVTGERLKE  
Os02g13580 TALNERSSRSHSVVTIHV--RGQDLKTG-NTLR-GALHLVDLAGSERVDRSAVTGDRLKE  
Os06g36080 TALNERSSRSHSVVTMHI--QGVDLKTG-VTLR-GALHLVDLAGSERVDRSAATGDRLKE  
Os01g54080 TALNERSSRSHSILTVHV--RGLDVKNG-STSR-GCLHLIDLAGSERVERSEATGDRLKE  
Os05g44560 TALNERSSRSHSILTVHV--RGLDVKNG-STSR-GCLHLIDLAGSERVERSEATGDRLKE  
At1g18410 TALNERSSRSHSIVTVHV--RGKDLKTG-SALY-GNLHLVDLAGSERVDRSEVTGDRLKE  
At1g73860 TALNERSSRSHSIVTVHV--RGKDLKTG-SVLY-GNLHLVDLAGSERVDRSEVTGDRLRE  
Os11g44880 TAMNDRSSRSHSCLTVHV--QGRDLTSR-TVLR-GCMHLVDLAGSERVDKSEVVGDRLKE  
OsKCH1 TAINDRSSRSHSCLSVHV--QGKYLTSG-AMLR-GCMHLVDLAGSERVDKSEVVGDRLKE  
Os03g18980 TALNDRSSRSHSCLTVHV--QGRDLTSG-TILR-GCMHLVDLAGSERVDKSEVTGERLKE  
At2g47500 TALNDRSSRSHSCLTVHV--QGRDLTSG-AVLR-GCMHLVDLAGSERVDKSEVTGDRLKE  
At1g09170 TAMNDRSSRSHSCLTVHV--QKDLTSG-VTLR-GSMHLVDLAGSERIDKSEVTGDRLKE  
ATK4 TAMNDRSSRSHSCLTVHV--QGRDLTSG-SILH-GSMHLVDLAGSERVDKSEVTGDRLKE

AtKP1 TALNERSSRSHSVLTVHV--QGKELASG-SILR-GCLHLVLDLAGSERVEKSEAVGERLKE  
OsKCH2 TALNERSSRSHSVLTVHV--QGKEIASG-STLR-GCLHLVLDLAGSERVDKSEAGERLNE  
AtKCBP TNMNESSRSHLILSVVI--ESIDLQTO-SAAR-GKLSFVDLAGSERVKKSGSAGCQLKE  
Os04g57140 TNMNVESSRSHLILSIII--ESTNLQTO-SYAR-GKLSFVDLAGSERVKKSGSAGKQLKE  
At1g55550 TNSNSVSSRSHCMIRVSV--TSLGAPER-RRET-NKIWLVDLGGSERVLKTRATGRRFDE  
Os01g15540 TMANSTSSRSHCLIRISL--TSLNATER-RKAT-SKLWMLDLAGSERLVKTKATGKRLKE  
At5g27950 TNVNETSSRSHCLTRITI--FRRGDAVG-SKTEVSKLWMLDLAGSERLLKTGATGQTMDE  
Os11g42800 TNVNDVSSRSHCLTRITI---KRSSGG-TTEEC SKLWLVLDLAGSERLLKTGASGLTMDE  
ATK2 TAMNEQSSRSHFVFTLKI--SGFNESTE-QQVQ-GVLNLDLAGSERLSKSGSTGDRLKE  
ATK3 TQMNEQSSRSHFVFTLRI--SGVNESTE-QQVQ-GVLNLDLAGSERLSKSGSTGDRLKE  
ATK5 THMNEQSSRSHFVFTLRI--SGVNESTE-QQVQ-GVLNLDLAGSERLSRSGATGDRLKE  
ATK1 TQMNEQSSRSHFVFTMRI--SGVNESTE-QQVQ-GVLNLDLAGSERLSKSGATGDRLKE  
Os03g64415 TQMNESSRSHCVFTLRF--FGVNEGTD-QQVQ-GVLNLDLAGSERLNKSGATGDRLKE  
Os04g53760 TQMNEQSSRSHFVFTLKI--SGSNENTG-QQVQ-GVLNLDLAGSERLAKSGSTGDRLKE  
Os07g01490 TQMNESSRSHCVFTLRI--FGVNEGTD-QQVQ-GVLNLDLAGSERLNKSGATGDRLKE  
At2g22610 NNVNEHSSRSHCMLSIMV--KAKNLMNG-DCTK-SKLWLVLDLAGSERLAKTDVQGERLKE  
Os03g02290 NNVNEHSSRSHCMLCIMV--RAENLMNG-ECTR-SKLWLVLDLAGSERLAKTDVQGERLKE  
At1g72250 TTANEHSSRSHCHICVMV--KGENLLNG-ECTR-SKLWLVLDLAGSERVAKTEVQGERLKE  
Os12g42160 TTANEHSSRSHCMHCVMV--KGENLMNG-EQTK-SKLWLVLDLAGSERVAKTEVQGERLKE  
At5g27550 TAANEQSSRSHCLLRVTV--KGENLING-QRTR-SHLWLVLDLAGSERVQKVEVEGERLKE  
Os05g33030 TSANELSSRSHSLVKVTV--RSEHLVTG-QKWR-SHIWLVDLAGSERVNTVEVEGDRLKE

\* . : : \*\* . \*\* . :

Os06g11380 FLHVSKLSALGDALASLSA----KKEPVLSGNSRITQILADSLGSSSKTLLIVHVS  
AtKCA1 LLHVMNSISALGDVLSLTS----GKDSIPYDNSILTRVLADSLGGSSKTLMIVNICPS  
AtKCA2 LLHVTNSISALGDVLSLTS----KRDTIPYENSFLTRILADSLGSSSKTLMIVNICPS  
AtKinesin-12A AGNINRSLSQLGNLILAIETISQTKPRHIPYRDSRLTFLQESLGGNAKLAMVCAVSPS  
At3g10310 AQYINKSLSCLDVIFSLAQ----KNSHIPYRNSKLTLLQDLSLGGQAKTLMFVHISPE  
Os01g14090 AQHINKSLSCLDVITALAQ----KNSHIPYRNSKLTQLLQSSLGGNAKTLMFVHISPE  
At1g63640 AQHINKSLSCLDVIFALAH----KNPVPYRNSKLTQVLQSSLGGQAKTLMFVQVNP  
At5g41310 AQHINKSLSCLDVIFALAH----KNPVPYRNSKLTQVLQSSLGGQAKTLMFVQINP  
Os02g13580 AQHINKSLSCLDVIFSLSQ----KNAHVPYRNSKLTQVLQSSLGGHAKTLMFVQVNP  
Os06g36080 AQHINKSLSCLDVIFSLSQ----KNAHVPYRNSKLTQVLQSSLGGNAKTLMFVQVNP  
Os01g54080 AQHINKSLSCLDVIFSLAQ----KNAHVPYRNSKLTQVLQSSLGGQAKTLMVQINP  
Os05g44560 AQHINKSLSCLDVIFALAQ----KNAHVPYRNSKLTQVLQSSLGGQAKTLMFVQINP  
At1g18410 AQHINKSLSCLDVIFSLAS----KSSHVPYRNSKLTQLLQSSLGGRAKTLMFVQVNP  
At1g73860 AQHINKSLSSLDVIFSLAS----KSSHVPYRNSKLTQLLQSSLGGRAKTLMFVQVNP  
Os11g44880 AQHINKSLAALGDVIFSLAQ----KNAHVPYRNSKLTQLLQSSLGGQAKTLMFVHIAPE  
OsKCH1 AQYINKSLSCLDVIFSLAQ----KNSHVPYRNSKLTQLLQSSLGGQAKTLMFVHISPE  
Os03g18980 AQHINKSLSCLDVIFSLAQ----KSAHVPYRNSKLTQLLQSSLGGQAKTLMFVHISPE  
At2g47500 AQHINRSLSCLDVIFSLAH----KNPVPYRNSKLTQLLQSSLGGQAKTLMFVHISPE  
At1g09170 AQHINKSLSCLDVIFSLSQ----KNNHIPYRNSKLTQLLQDALGGQAKTLMFVHISPE  
ATK4 AQHINKSLSCLDVIFSLSQ----KTSHVPYRNSKLTQLLQSSLGGSAKTLMFVHISPE  
AtKP1 AQHINKSLSCLDVIFSLAQ----KSSHVPYRNSKLTQVLQSSLGGQAKTLMFVHISPE  
OsKCH2 AKHINKSLSCLDVIFSLAQ----KSSHVPYRNSKLTQVLQDALGGQAKTLMFVHMNPE  
AtKCBP AQSINKSLSCLDVIFALSS----GNQHIPYRNHKLTMMSDSLGGNAKTLMFVNVSPA  
Os04g57140 AQSINKSLSCLDVIFALSS----DGQHIPYRNHKLTMMSDSLGGNAKTLMFVNVSPA  
At1g55550 GKAINLSLSCLDVIFSLQR----KNSHIPYRNSKLTQVLKDSLGGQAKTLMVHISPK  
Os01g15540 GKAINLSLSCLDVIDALQT----KKPHVPYRNSKLTQVLRDSLGCESKTLMLVHISPD  
At5g27950 GRAINLSLSCLDVIFALRR----KKGHVPYRNSKLTQILKDSLGRSKVLMVHISPR  
Os11g42800 GKAINLSLSCLDVIFALRR----KRSHVPYRNSKLTQILSDSLGGSKVLMVHISPS  
ATK2 TQAINKSLSSLDVIFALAK----KEDHVPFRNSKLTLLQPCPLGGDSKTLMFVNIPE  
ATK3 TQAINKSLSSLDVIFALAK----KEDHVPFRNSKLTLLQPCPLGGDAKTLMFVNIPE  
ATK5 TQAINKSLSALSDVIFALAK----KEDHVPFRNSKLTLLQPCPLGGDSKTLMFVNISP  
ATK1 TQAINKSLSALSDVIFALAK----KEDHVPFRNSKLTLLQPCPLGGDSKTLMFVNISP  
Os03g64415 TQAINKSLSCLSDVIFSLIAK----KEEHVPFRNSKLTLLQPCPLGGDSKTLMFVNISP  
Os04g53760 TQAINKSLSALSDVIFALIAK----GDDHVPFRNSKLTLLQPCPLGGDSKTLMFVNISP  
Os07g01490 TQAINKSLSCLSDVIFSLIAK----KEEHVPFRNSKLTLLQPCPLGGDSKTLMFVNISP  
At2g22610 AQNINRSLSCLDVIFALAT----KSSHIPYRNSKLTLLQDLSLGGDSKTLMFVQISPS  
Os03g02290 AQNINRSLSCLDVIFALAT----KNSHIPYRNSKLTLLQDLSLGGDSKALMFVQISPS  
At1g72250 TQAINKSLSCLSDVIFALAN----KSSHIPFRNSKLTLLQDLSLGGDSKTLMFVQISPN  
Os12g42160 AQNINKSLSALSDVIFALAT----KSQHIPFRNSKLTLLQDLSLGGDSKTLMFVQISPN  
At5g27550 SQFINKSLSALSDVIFALAS----KTSHIPYRNSKLTLLQDLSLGGDSKTLMFVQISPS  
Os05g33030 SQFINKSLSALSDVIFALAS----KNAHIPYRNSKLTLLQDLSLGGDSKTLMFVQISPS

: \*\*: \*.: : : : : : : \* : : .\*. .\* : . : \*

Os06g11380 ASNLSRTLSTLSFSARAKNAE-----  
AtKCA1 VQTLSETISCLNYAARANTV-----  
AtKCA2 ARNLSEIMSCLNIAARANTV-----  
AtKinesin-12A QSCRSEFSTLRFARAKAIQNKAVVNEVMQDDVNFLRGVHQLRDELQRMKNDGNNPTN  
At3g10310 EDSFGETISTLKFAQRVSTVE-----

Os01g14090 ADSYVETLSTLKFAQRASCVE-----  
 At1g63640 GDSYAETVSTLKFAERVSGVE-----  
 At5g41310 EDSYAETVSTLKFAERVSGVE-----  
 Os02g13580 VSSYTETLSTLKFAERVSGVE-----  
 Os06g36080 VSSYAETLSTLKFADRVSGVE-----  
 Os01g54080 IESYSETISTLKLAERVSGVE-----  
 Os05g44560 VESYSETISTLKFAERVSGVE-----  
 At1g18410 ITSYSMSSTLKFAERVSGVE-----  
 At1g73860 ATSYSMSSTLKFAERVSGVE-----  
 Os11g44880 PDAIGESISTLKFAERVATVE-----  
 OsKCH1 LDAVGETISTLKFAERVASVE-----  
 Os03g18980 SDALGESISTLKFAERVSTVE-----  
 At2g47500 ADAVGETISTLKFAERVATVE-----  
 At1g09170 LEDLGETLSTLKFAERVATVD-----  
 ATK4 PDTLGETISTLKFAERVGSVE-----  
 AtKP1 VNAVGETISTLKFAQRVASIE-----  
 OsKCH2 ADAFGETMSTLKFAERVATVE-----  
 AtKCBP ESNLDETYNSLLYASRVRTIV-----  
 Os04g57140 ESNLEETYNSLMYASRVRCIV-----  
 At1g55550 EDDLCEITICSLNFATRAKNIH-----  
 Os01g15540 EGDLCETICTLGFATRVR SIR-----  
 At5g27950 DEDVGETICSLSFTRARAVE-----  
 Os11g42800 DDDIGETVCSLSFAKRARSIE-----  
 ATK2 PSSTGESLCSLRFAARVNACE-----  
 ATK3 SSSTGESLCSLRFAARVNACE-----  
 ATK5 PSSTGESLCSLRFAARVNACE-----  
 ATK1 PTSAGESLCSLRFAARVNACE-----  
 Os03g64415 VSSSTGESICSLRFAARVNACE-----  
 Os04g53760 ASSVGETICSLRFAARVNACE-----  
 Os07g01490 VSSSTGESICSLRFAARVNACE-----  
 At2g22610 EHDVSETLSSLNFATRVRGVE-----  
 Os03g02290 NNDVSETLSSLNFASRVRRIE-----  
 At1g72250 ENDQSETLCSLNFA SRV R G I E-----  
 Os12g42160 ENDVGETLCSLNFA SRV R G I E-----  
 At5g27550 SADLGETLCSLNFA SRV R G I E-----  
 Os05g33030 SADSGETLCSLNFA SRV R A I D-----

\* : \*

Os06g11380 -----LS---LGNRDTIKKWKDVANDSRKELHDKEKEVLDLR  
 AtKCA1 -----PS---LGNRDTIKKWRDVASDARKELEKEKEREQNQNK  
 AtKCA2 -----PS---LGNRDTIKKWRDVANDARKEVLEKEKEREQNQLK  
 AtKinesin-12A PNVAYSTAWNARRSLNLLRSFGLGHPRLSPHED--N-----DGDIEMELID  
 At3g10310 -----LG---AARAH--K-----ETREVMHLK  
 Os01g14090 -----LG---TAHAN--K-----ESNEIRELK  
 At1g63640 -----LG---AAKSS--K-----EGRDVRQLM  
 At5g41310 -----LG---AARSY--K-----EGRDVRQLM  
 Os02g13580 -----LG---VARSNKEGK-----EGKDVKELM  
 Os06g36080 -----LG---AAKAN--K-----EGKDIKEFK  
 Os01g54080 -----LG---AARSN--R-----EGKDIKELL  
 Os05g44560 -----LG---AARSN--K-----EGKDIKELL  
 At1g18410 -----LG---AAKSS--K-----DGRDVRQLM  
 At1g73860 -----LG---AAKTS--K-----EGKDVRDLK  
 Os11g44880 -----LG---AAKSN--K-----EGGEVKELK  
 OsKCH1 -----LG---AAKAN--K-----EGSEVRELK  
 Os03g18980 -----LG---AARLN--K-----ESGEVKELK  
 At2g47500 -----LG---AARVN--N-----DTSDEVKELK  
 At1g09170 -----LG---AARVN--K-----DTSEVKELK  
 ATK4 -----LG---AARVN--K-----DNSEVKELK  
 AtKP1 -----LG---AARSN--K-----ETGEIRD LK  
 OsKCH2 -----LG---AAHAN--K-----EVGQVKDLK  
 AtKCBP -----ND---PSKHI-----SSKEMVRLK  
 Os04g57140 -----ND---TSKHV-----APKEIMRLK  
 At1g55550 -----LG---QDEST-----EEQAKKEAV  
 Os01g15540 -----LESEEPPEMKA--RKETLLIDLQKVN DLEHECEDIR  
 At5g27950 -----SNRGL-----TAE L Q K L R  
 Os11g42800 -----SSKEL-----SEDIKKLK  
 ATK2 -----IG---TAHRH-----VNARPLD  
 ATK3 -----IG---TPRRQ-----TNIKPLE  
 ATK5 -----IG---IPRRQ-----TSAKLLD  
 ATK1 -----IG---IPRRQ-----TSTKLLD  
 Os03g64415 -----IG---IPRRQ-----TQVRS LA

Os04g53760 -----IG----IPRRH-----TQARSF  
Os07g01490 -----IG----IPRRQ-----TQVRS  
At2g22610 -----LG----PARKQ--V-----DTGEIQK  
Os03g02290 -----LG----PAKKQ--V-----DTAELQK  
At1g72250 -----LG----PARKQ--L-----DNTPELLK  
Os12g42160 -----LG----QARKQ--V-----DVGELSR  
At5g27550 -----SG----PARKQ-----ADVSELL  
Os05g33030 -----HG----PARKQ--A-----DPAETF

Os06g11380 QE-VLGLKLSLKEANDQCITLLFNEVQKAWRVSSLTQADLKSENMLLAEKHRIEKEQNNQL  
AtKCA1 QE-VVGLKKALKDANDQCIVLLYSEVQRWVVSFTLQSDLKSENIMLVDKHRLEKEQNSQL  
AtKCA2 QE-VTGLKQALKEANDQCIVLLYNEVQRWVVSFTLQSDLKSENAMVVDKHKIEKEQNFQL  
AtKinesin-12A EAAVERLCVQVGLQSSLASEGINHDMNRVKS IHSSDGQS IEKRLEPESDVAMEDACCHTE  
At3g10310 EQ-IENLKRALGTE-----  
Os01g14090 EQ-VENLKRALAAKEL-----  
At1g63640 EQ-VSNLKDVIKDE-----  
At5g41310 EQ-VSNLKDVIKDE-----  
Os02g13580 DQ-LSLLKDTISKDE-----  
Os06g36080 EQ-LSLLKDKIAKDE-----  
Os01g54080 EQ-VASLKDVIKDM-----  
Os05g44560 EQ-VASLKDVIKDM-----  
At1g18410 EQ-LGSLKDTIARKDD-----  
At1g73860 EQ-LASLKDVIKDE-----  
Os11g44880 EQ-IACLKAALAKKDG-----  
OsKCH1 EQ-IATLKAALAKKEG-----  
Os03g18980 EQ-IARLKSSLAMKDS-----  
At2g47500 EQ-IATLKAALARKEA-----  
At1g09170 EQ-IASLKLALARKES-----  
ATK4 EQ-IANLKMALVRKGN-----  
AtKFP1 DE-ISSLKSAMEKKEA-----  
OsKCH2 EE-ISKLLALDDKER-----  
AtKCBP KL-VAYWKEQAGKGE-----  
Os04g57140 KL-IAYWKEQAGKRSE-----  
At1g55550 MMNLQKMMKIEQERE-----  
Os01g15540 RK-IKNLEESMEHLTG-----PQPTIYSNFDMSH  
At5g27950 EKKISELEEMEEETQE-----  
Os11g42800 QKRIAELDKIICDAEQ-----  
ATK2 YR-LSLG-----  
ATK3 NR-LSLG-----  
ATK5 SR-LSYG-----  
ATK1 SR-LSYG-----  
Os03g64415 QG-----  
Os04g53760 SR-LSYG-----  
Os07g01490 QG-----  
At2g22610 AM-VEKARQESRSKDE-----  
Os03g02290 QM-LERAKQDIRLKDD-----  
At1g72250 QM-VEKWKQDMKGD-----  
Os12g42160 LM-AGRAKQDSKNKDA-----  
At5g27550 KS--KQMAEKLKHEEK-----  
Os05g33030 QM-TEKIRHEEKENAK-----LLESQ

Os06g11380 RDQISRLLVEQEQQIKMHERDLTIQSLQAKLKSIESQLNEALNSSDARSTIGSESASVI  
AtKCA1 RNQIAQFLQLDQEQLQMQQQDSAIQNLQAKITDLESQVSEAVRSDTTRTGDALQSQDIF  
AtKCA2 RNQIAQLLQLEQEQLQAQQDSTIQNLQSKVKDLESQLSKALKSDMTRSRDPLE-----  
AtKinesin-12A NHEPETVDNMRTEETETGIRENQIKTHSQTLDHESSEFQPLSVKD-----  
At3g10310 --EWNVSNNGSKEIKSPFRPIATERTPPRLRRLSIENCSST-----  
Os01g14090 --EKSSFLLKENTVVRERAKQVPERTPPRPRRLSLENTGIGK-----  
At1g63640 --ELQNFQKVKGNATSLKRGSLNLRLLVGFPSPRRHISGASPN-----  
At5g41310 --ELQKFQNINGIQKRGSLKLRIVSPRRHSLGGALTNSPRR-----  
Os02g13580 --EIDRLQLNLSSTRLKPTRQADSVLKHSSSSPGITSLGKGT-----  
Os06g36080 --EISRLQLQSHNTPRATAKRADSLKHSSSSPGISSLGSKIQ-----  
Os01g54080 --EIEQLQLLKSFPNSMTRNGSNLLRQSTSSSTGLSSLPVAS-----  
Os05g44560 --EIEQLQLMCKVKSPSFAVDINGASMPKNSNSDLRSVLSIT-----  
At1g18410 --EIERLHLLKDIINYPQRLQKKS LGQSDDFNSEAGDSQLSIED-----  
At1g73860 --EIERLQHQPRLQKSMRRKSIHTDDINSDTGEY-----  
Os11g44880 --ETESIRSTQSSPDIYRMRMSAPPFRNPMEEVGNLETRSN-----  
OsKCH1 --EPENIQSTQSSPDMYRIKRGNAIPAFPNRQPMEEVGNLEV-----  
Os03g18980 --GSEQNINRDPEAFNMKMPSPGFSNRRQGSCELVSSQTNF-----  
At2g47500 -----ESQNNILKTPGGSEKHAKTGEVEIHNNNIM-----

At1g09170 --GADQTQLQRPLTPDKLLRKKSLGVSSSFKSNSTRQVQTK-----  
 ATK4 -GNDVQPTAIPINRERISRRRSLPTTIRPKLPTMGNTSNNRS-----  
 AtKP1 -ELEQLRSGSIRNTECQRARAVSPFHLPRGTGNGAGTKAEAS-----  
 OsKCH2 -EASKLRDIANRVASEKRNARTRSPLTTTLSSKPEAGQDSSV-----  
 AtKCBP -----EEDLVDI EEDRTRKDEADS-----  
 Os04g57140 -----DDLEEIQEERTPKKADNRLTS-----  
 At1g55550 -MSLRKMRNLNETLEKLTGKPHVIEEEEKDVVREVIHVTPKKP-----  
 Os01g15540 LSSEELKTDVSSNVNSKNRREASSRLPRFMKPTASSQHRIGL-----  
 At5g27950 --GCKKIKARLQEV ECLVNEHKKLFWITNDKYLEDIEKKAISP-----  
 Os11g42800 --ELKDLNEQIKRAETSLEERKKLSSSACQALSDEKGSPRSTL-----  
 ATK2 -----  
 ATK3 -----  
 ATK5 -----  
 ATK1 -----  
 Os03g64415 -----  
 Os04g53760 -----  
 Os07g01490 -----  
 At2g22610 --SIKKMEENIQNLEGKNGRDNYSRSLQEKNDLQNLDSVH-----  
 Os03g02290 --SLRKLLEDNCQNLNENKAKGKEQFYKNLQEKVKELESQLDKSM-----  
 At1g72250 --QIRKMEETMYGLEAKIKERDTKNTLQDKVKELESQLLVER-----  
 Os12g42160 --QIKSMEETIQSLEAKNAKDLLTMNLQEKIKELEAQLLVER-----  
 At5g27550 --ETKKLQDNVQSLQLRLTAREHICRGLQDKVRDLEFQLAEER-----  
 Os05g33030 QLKYSARENVIKTLQEKIREAEQTSKTYQQRVRELENELANEK-----

Os06g11380 -STPKMESTADSSSVTKRLEEEELAKRDALIEKLHEENEKLFDRLTEKSGLGSSFPQAPSP  
 AtKCA1 SPIPKAVEGTTDSSSVTKLEEEELKRRDALIERLHEENEKLFDRLTERS-MAVSTQVLSP  
 AtKCA2 -PQPRAENTLDSSAVTKKLEEEELKRRDALIERLHEENEKLFDRLTEKS-VASSTQVSSP  
 AtKinesin-12A -ALCSSLNKSEDVSSCPDLPVQDVTSANVLIADGVDDPEHLVNSASPSLCID-----  
 At3g10310 -KANLEDRRGIKS-----  
 Os01g14090 -SIPDRKGPKSPL-----  
 At1g63640 -ARRGKASGLF-----  
 At5g41310 -QGPGLLGRITSD-----  
 Os02g13580 -----  
 Os06g36080 -HRRTASGGRIKI-----  
 Os01g54080 -QQNQQLSGSVEA-----  
 Os05g44560 -TNQQSQLSDPQS-----  
 At1g18410 -DSRFQHDYTRQS-----  
 At1g73860 -----  
 Os11g44880 -GTPRQKKRFELPDVEN-----  
 OsKCH1 -RNNATPMQKASFQFSGVLSN-----  
 Os03g18980 -RQPMEDVGNIEVRANPTLRQ-----  
 At2g47500 -TKKSESCEVEEI-----  
 At1g09170 -HKPSQIDVNSIEG-----  
 ATK4 -PQIMDLSGPEAFNDST-----  
 AtKP1 -PQPNDGTRSYETRSCSTGKQRKSGFPSALRNRE-----  
 OsKCH2 -DTCTSEIRSSS-----  
 AtKCBP -----  
 Os04g57140 -----  
 At1g55550 -RNKSRRASDVFPFMRPTASSNRRLSGADFVTPN-----  
 Os01g15540 -NNRTPIIINRLKPPVPPRRRPPSSVYAESVMVPVNAAP-----  
 At5g27950 -LDHLKDDATPI-----  
 Os11g42800 -VVVGHIDSAESP-----  
 ATK2 -----  
 ATK3 -----  
 ATK5 -----  
 ATK1 -----  
 Os03g64415 -----  
 Os04g53760 -----  
 Os07g01490 -----  
 At2g22610 -NQSEKQYAQLQE-----RLKSRDEICSNLQQKVKELECKLREHQSDSAA-----  
 Os03g02290 -HSQITSEKQONELFGKLEKEEMCTTLQKQIAE-----  
 At1g72250 -KLARQHVDTKIAEQQTQQTEDENNTSKRPPLTNILLGSASK-----  
 Os12g42160 -KIARQHVNDNKIAQ-----  
 At5g27550 -KTRIKQESRALATASSTTTTTSRHLRETLPTIIEK-----  
 Os05g33030 -KAARDTARST-----

Os06g11380 SNKQTAQGRDIGRSDSTKQSSDVFPPLVPSQDKAGNSGAIVKSSNELKTTTPAGEYLTS  
 AtKCA1 SLRASPNI-QPANVNSRGEYSAAVALPSTPNKNGAITLVKSGTDLVKTTTPAGEYLTA  
 AtKCA2 SSKASPTV-QPADVDSAG-----TLPSSVDKNEGITLVKSSSELVKTTPAGEYLTA

AtKinesin-12A -----PVGATPVLKSP T LSVSP TIRNSRKSLKTSELSTASQK DSEGENLVT  
At3g10310 -----PLASRR A Q I L S L E G P M S C K N E E N G K G D P T  
Os01g14090 -----SVTKLNRDHATI HDSIDGFNHHIMHQGSVMQ  
At1g63640 -----G R G T S D V D N C S E Y S S K H S D S G S Q Q S  
At5g41310 -----I H R H Q N E S R S S S K F S G G A K D N N I F E D T E L L G  
Os02g13580 -----V G S G A A S D L D N F S D T S D R Q S E A G S M L S  
Os06g36080 -----V G S R A G S D V D N F S D I S D R H S E A G S M Q S  
Os01g54080 -----E A E D N A S D  
Os05g44560 -----Y A E V N R D G G P T S Y  
At1g18410 -----R H S V T D G E A L A S  
At1g73860 -----S S Q S R Y S V T D G E S L A S  
Os11g44880 -----D T S S W L D T S S K E A A L G E W V N N S Q F G S S N S L  
OsKCH1 -----N S S D L A E N C N G I Q K T D R M A V G N N Q F E N G N S I  
Os03g18980 -----K K P S F D L Q D L L A S N D S P S W P D S I S R A N F Q M G  
At2g47500 -----T V N S P P W P P V A S P G Q A Y R E  
At1g09170 -----Q S D S A S S L D L Q G L V G S P S W K T P P R D G K E E D M  
ATK4 -----A S S R R H S L D I H E L M K S S S P A W P R Q P L N G K D E  
AtKP1 -----A S P R M P N L A E E R L N P S P S R R S L S T D R A S T I K  
OsKCH2 -----S G K Q R R F R S P L S V R E L D E K S F V I N R E L Y L S A  
AtKCBP -----  
Os04g57140 -----  
At1g55550 -----S S S F K S R R N S M I S V R A E S A C L P V K K K K N R F D  
Os01g15540 -----W Q E C S S E C S M S L T S D M N W T P S I R D G T E C S Q  
At5g27950 -----S S D K L V K I R K S S G F V P R F M T S T V A S R  
Os11g42800 -----Q A T E K T K S R A S H G S V P H F M S P T V C S P Q R H S S  
ATK2 -----  
ATK3 -----  
ATK5 -----  
ATK1 -----  
Os03g64415 -----  
Os04g53760 -----  
Os07g01490 -----  
At2g22610 -----N N Q -----K V K D L E N N L K E S E G S S L V W Q Q K V K D Y E N K L K  
Os03g02290 -----E S E K L R L Q Q Q S E S E I K E L E L K L K E Q E H H R S  
At1g72250 -----E M V N L T R P S L L E S T S Y D L A P L P S G V P K Y N D  
Os12g42160 -----D H L H Q Q Q S K K P E N S F C P T R S P M A E R N L N S T  
At5g27550 -----K P P L A P T R M R M P L R R I T N F M P Q Q Q P S Q G H S K  
Os05g33030 -----K P P L A P M R Q R P P L G R I G N H I P P K A P L R L R L S

Os06g11380 ALMDFDPNQFEGVA AIADGANKLLMLPYFHCHRDYNETPPISDWCMVLA AVIKAGAAREH  
AtKCA1 ALNDFDPEEYEG LAAIADGANKLLML-----VLA AVIKAGASREH  
AtKCA2 ALNDFDPEQEYEG LAAIADGANKLLML-----VLA AVIKAGASREH  
AtKinesin-12A EAADPSPATSKKMNCSSALSTQKSKVFPV RTERLASSLHKGIKLLLESY CQSTAQR RSTY  
At3g10310 MEVHQLKNPRSPLSSYQNR A-----  
Os01g14090 MSATSS EDPVRETEKIIITVDTVPF CGLHP-----  
At1g63640 SDERKHQDYHQPSKFAGAAKGIDFDD-----  
At5g41310 FEESNNEERLSDISDSCLSMG-----  
Os02g13580 VDPEISGLADVDS DGRLS-----  
Os06g36080 VDDIQQ SREIMGLSKLSMSEM-----  
Os01g54080 DGCSVGETEYSPAGASE T-----  
Os05g44560 TDI TPTCLDEADFE DNASEDGFSG-----  
At1g18410 STDAEYDDETEGSTDAPCAA-----  
At1g73860 SAEAEYDERLSEIT-----  
Os11g44880 LELGPDATQDVVFYQRNSPEPQW-----  
OsKCH1 LELEPGATQLPTFFYQRYDPDKQR-----  
Os03g18980 EERV TIGGEWIDKVVVNNNSVG-----  
At2g47500 DDRSFGSSEWVDKVMVNNRQDEMR-----  
At1g09170 EFIIIPGSEWVDKHEDEITR SSKPENR-----  
ATK4 DRESKSGEWIDKHEELIQNQPN S-----  
AtKP1 SRNKPDVTQNLVPSRT PFPARVPVV-----  
OsKCH2 KFKTPSPPPVRSLSAERVGIKSV-----  
AtKCBP -----  
Os04g57140 -----  
At1g55550 SACDSSDRSVSKSTS IMRQNTADDAT-----  
Os01g15540 DASEYEIKQVIFSEHEKSSHDQVTCYTDY-----  
At5g27950 QRQTMSEKEINAKAQ SIRS-----  
Os11g42800 ASHSATKTR LTKSV-----  
ATK2 -----  
ATK3 -----  
ATK5 -----

ATK1  
Os03g64415  
Os04g53760  
Os07g01490  
At2g22610 ESEGN<sup>S</sup>LVW<sup>Q</sup>Q<sup>K</sup>I<sup>K</sup>E<sup>L</sup>E<sup>I</sup>K<sup>H</sup>K<sup>D</sup>E  
Os03g02290 VAES<sup>K</sup>I<sup>K</sup>E<sup>L</sup>E<sup>L</sup>K<sup>L</sup>K<sup>E</sup>Q<sup>E</sup>H<sup>H</sup>R<sup>S</sup>V<sup>A</sup>ES<sup>K</sup>AME  
At1g72250 LSE<sup>K</sup>EN<sup>N</sup>PE<sup>M</sup>AD<sup>Q</sup>V<sup>H</sup>L<sup>P</sup>N<sup>K</sup>T<sup>G</sup>R<sup>F</sup>S  
Os12g42160 AE<sup>K</sup>P<sup>V</sup>T<sup>L</sup>L<sup>K</sup>D<sup>L</sup>G<sup>I</sup>A<sup>R</sup>Q<sup>M</sup>F<sup>S</sup>D<sup>S</sup>N<sup>T</sup>D<sup>T</sup>Y  
At5g27550 RF<sup>S</sup>D<sup>T</sup>T<sup>F</sup>K<sup>E</sup>N<sup>N</sup>S<sup>N</sup>R<sup>R</sup>S<sup>S</sup>S<sup>M</sup>D<sup>V</sup>N<sup>T</sup>L<sup>M</sup>K  
Os05g33030 KA<sup>P</sup>T<sup>I</sup>Q<sup>N</sup>K<sup>E</sup>N<sup>I</sup>P<sup>V</sup>M<sup>L</sup>N<sup>K</sup>G<sup>S</sup>S<sup>G</sup>A<sup>D</sup>T<sup>S</sup>K<sup>A</sup>V<sup>A</sup>

Os06g11380 E<sup>I</sup>L<sup>A</sup>E<sup>I</sup>R<sup>D</sup>A<sup>V</sup>F<sup>S</sup>F<sup>I</sup>R<sup>K</sup>M<sup>E</sup>P<sup>R</sup>K<sup>V</sup>M<sup>D</sup>T<sup>M</sup>L<sup>V</sup>S<sup>R</sup>V<sup>K</sup>I<sup>L</sup>Y<sup>I</sup>R<sup>S</sup>L<sup>L</sup>A<sup>R</sup>S---PE<sup>L</sup>Q<sup>S</sup>I<sup>K</sup>V<sup>S</sup>P<sup>V</sup>E<sup>R</sup>  
AtKCA1 E<sup>I</sup>L<sup>A</sup>E<sup>I</sup>R<sup>D</sup>S<sup>V</sup>F<sup>S</sup>F<sup>I</sup>R<sup>K</sup>M<sup>E</sup>P<sup>R</sup>R<sup>V</sup>M<sup>D</sup>T<sup>M</sup>L<sup>V</sup>S<sup>R</sup>V<sup>R</sup>I<sup>L</sup>Y<sup>I</sup>R<sup>S</sup>L<sup>L</sup>A<sup>R</sup>S---PE<sup>L</sup>Q<sup>T</sup>I<sup>R</sup>V<sup>S</sup>P<sup>V</sup>E<sup>C</sup>  
AtKCA2 E<sup>I</sup>L<sup>A</sup>E<sup>I</sup>R<sup>D</sup>S<sup>V</sup>F<sup>S</sup>F<sup>I</sup>R<sup>K</sup>M<sup>E</sup>P<sup>R</sup>R<sup>V</sup>M<sup>D</sup>T<sup>M</sup>L<sup>V</sup>S<sup>R</sup>V<sup>R</sup>I<sup>L</sup>Y<sup>I</sup>R<sup>S</sup>L<sup>L</sup>A<sup>R</sup>S---PE<sup>L</sup>Q<sup>S</sup>I<sup>K</sup>V<sup>S</sup>P<sup>V</sup>E<sup>R</sup>  
AtKinesin-12A RF<sup>S</sup>FK<sup>A</sup>PD<sup>S</sup>E<sup>P</sup>ST<sup>S</sup>I<sup>S</sup>K<sup>A</sup>D<sup>A</sup>G<sup>V</sup>Q<sup>T</sup>I<sup>P</sup>G<sup>A</sup>D<sup>A</sup>I<sup>S</sup>E<sup>N</sup>T<sup>K</sup>E<sup>F</sup>L<sup>C</sup>C<sup>K</sup>C<sup>K</sup>CR<sup>E</sup>Q<sup>F</sup>DA<sup>Q</sup>Q<sup>M</sup>G<sup>D</sup>M<sup>P</sup>N  
At3g10310 ---VK<sup>V</sup>D<sup>G</sup>R<sup>T</sup>S<sup>I</sup>P<sup>Q</sup>L<sup>Q</sup>  
Os01g14090 ---DA<sup>Y</sup>I<sup>S</sup>S<sup>K</sup>Q<sup>S</sup>G<sup>L</sup>D<sup>T</sup>  
At1g63640 ---ED<sup>V</sup>EL<sup>V</sup>G<sup>L</sup>AD<sup>A</sup>D<sup>S</sup>  
At5g41310 ---TE<sup>T</sup>D<sup>G</sup>S<sup>I</sup>S<sup>S</sup>GA<sup>M</sup>E  
Os02g13580 ---DA<sup>S</sup>D<sup>G</sup>I<sup>S</sup>M<sup>G</sup>EA<sup>D</sup>  
Os06g36080 ---GH<sup>N</sup>S<sup>V</sup>D<sup>P</sup>EL<sup>P</sup>CF<sup>G</sup>  
Os01g54080 ---  
Os05g44560 ---GT<sup>D</sup>Y<sup>S</sup>V<sup>G</sup>CA<sup>A</sup>GA<sup>S</sup>  
At1g18410 ---EG<sup>R</sup>K<sup>P</sup>L<sup>K</sup>I<sup>S</sup>D<sup>K</sup>P<sup>K</sup>  
At1g73860 ---SD<sup>A</sup>AS<sup>M</sup>GT<sup>Q</sup>GS<sup>I</sup>D  
Os11g44880 ---SW<sup>A</sup>GS<sup>V</sup>AT<sup>E</sup>DS<sup>D</sup>D  
OsKCH1 ---RR<sup>A</sup>EP<sup>V</sup>ET<sup>D</sup>DS<sup>D</sup>S  
Os03g18980 ---DW<sup>E</sup>GS<sup>A</sup>AL<sup>P</sup>DF<sup>F</sup>  
At2g47500 ---RV<sup>E</sup>SL<sup>W</sup>GG<sup>A</sup>T<sup>E</sup>N  
At1g09170 ---A<sup>H</sup>T<sup>Q</sup>L<sup>E</sup>K<sup>R</sup>T<sup>S</sup>SL<sup>K</sup>  
ATK4 ---PE<sup>Q</sup>F<sup>Y</sup>Q<sup>S</sup>M<sup>V</sup>P<sup>Q</sup>Q<sup>Q</sup>  
AtKPF1 ---KS<sup>F</sup>ST<sup>V</sup>PL<sup>N</sup>PS<sup>A</sup>E  
OsKCH2 ---ER<sup>S</sup>EN<sup>I</sup>D<sup>C</sup>T<sup>P</sup>V<sup>S</sup>R  
AtKCBP  
Os04g57140 ---  
At1g55550 ---V<sup>Y</sup>S<sup>Q</sup>D<sup>I</sup>SE<sup>C</sup>D---IK<sup>L</sup>V<sup>V</sup>SE<sup>H</sup>K<sup>P</sup>K<sup>P</sup>L  
Os01g15540 ---PL<sup>A</sup>ES<sup>R</sup>D<sup>I</sup>Q<sup>I</sup>K<sup>I</sup>E  
At5g27950 ---VA<sup>K</sup>N<sup>L</sup>T<sup>Q</sup>F<sup>S</sup>T<sup>S</sup>Q<sup>S</sup>  
Os11g42800 ---NR<sup>Y</sup>PA<sup>E</sup>L<sup>S</sup>GS<sup>H</sup>S  
ATK2  
ATK3  
ATK5  
ATK1  
Os03g64415  
Os04g53760  
Os07g01490  
At2g22610 ---QS<sup>Q</sup>E<sup>A</sup>V<sup>L</sup>L<sup>R</sup>Q<sup>K</sup>I<sup>K</sup>  
Os03g02290 ---IG<sup>Q</sup>EL<sup>L</sup>ET<sup>Q</sup>R<sup>T</sup>E<sup>A</sup>  
At1g72250 ---IC<sup>A</sup>K<sup>R</sup>I<sup>P</sup>S<sup>A</sup>P<sup>A</sup>P<sup>R</sup>  
Os12g42160 ---S<sup>I</sup>N<sup>H</sup>L<sup>M</sup>S<sup>M</sup>S<sup>S</sup>E<sup>K</sup>E  
At5g27550 ---PR<sup>R</sup>SS<sup>I</sup>A<sup>F</sup>R<sup>P</sup>A<sup>P</sup>A  
Os05g33030 ---G<sup>K</sup>ARR<sup>V</sup>SL<sup>T</sup>P<sup>V</sup>IR

Os06g11380 F<sup>L</sup>E<sup>K</sup>S<sup>H</sup>T<sup>S</sup>R<sup>S</sup>R<sup>S</sup>S<sup>S</sup>R<sup>G</sup>S<sup>S</sup>P<sup>G</sup>R<sup>S</sup>P<sup>V</sup>H<sup>H</sup>H<sup>D</sup>H<sup>G</sup>S<sup>R</sup>T<sup>S</sup>L<sup>I</sup>D<sup>E</sup>H<sup>V</sup>H<sup>G</sup>F<sup>K</sup>V<sup>N</sup>I<sup>K</sup>P<sup>E</sup>R<sup>K</sup>S<sup>K</sup>F<sup>S</sup>S<sup>I</sup>V  
AtKCA1 F<sup>L</sup>E<sup>K</sup>P<sup>N</sup>T<sup>G</sup>R<sup>S</sup>K<sup>S</sup>T<sup>S</sup>R<sup>G</sup>S<sup>S</sup>P<sup>G</sup>R<sup>S</sup>P<sup>V</sup>R<sup>Y</sup>---L<sup>D</sup>T<sup>Q</sup>I<sup>H</sup>G<sup>F</sup>K<sup>V</sup>N<sup>I</sup>K<sup>A</sup>E<sup>R</sup>R<sup>N</sup>K<sup>L</sup>A<sup>S</sup>V<sup>V</sup>  
AtKCA2 F<sup>L</sup>E<sup>K</sup>P<sup>Y</sup>T<sup>G</sup>R<sup>T</sup>R<sup>S</sup>S<sup>S</sup>G<sup>S</sup>S<sup>S</sup>P<sup>G</sup>R<sup>S</sup>P<sup>V</sup>R<sup>Y</sup>---Y<sup>D</sup>E<sup>Q</sup>I<sup>Y</sup>G<sup>F</sup>K<sup>V</sup>N<sup>L</sup>K<sup>P</sup>E<sup>K</sup>K<sup>S</sup>K<sup>L</sup>V<sup>S</sup>V<sup>V</sup>  
AtKinesin-12A L<sup>Q</sup>L<sup>V</sup>P<sup>V</sup>D<sup>N</sup>SE<sup>V</sup>A<sup>E</sup>K<sup>S</sup>K<sup>N</sup>Q<sup>V</sup>P<sup>K</sup>A<sup>V</sup>E<sup>K</sup>V<sup>L</sup>AG<sup>S</sup>I<sup>R</sup>RE<sup>M</sup>A<sup>L</sup>E<sup>E</sup>F<sup>C</sup>T<sup>K</sup>Q<sup>A</sup>SE<sup>I</sup>T<sup>Q</sup>L<sup>N</sup>R<sup>L</sup>V<sup>Q</sup>Q<sup>Y</sup>K<sup>H</sup>  
At3g10310 LL<sup>Q</sup>T<sup>F</sup>V<sup>K</sup>G<sup>A</sup>S<sup>R</sup>N<sup>D</sup>I<sup>Q</sup>M<sup>I</sup>S<sup>V</sup>D<sup>S</sup>---  
Os01g14090 LL<sup>R</sup>T<sup>P</sup>C<sup>R</sup>S<sup>R</sup>N<sup>L</sup>N<sup>L</sup>E<sup>V</sup>G<sup>Q</sup>T<sup>D</sup>E<sup>P</sup>SS<sup>S</sup>A<sup>K</sup>---LE<sup>K</sup>M<sup>T</sup>S<sup>S</sup>  
At1g63640 ED<sup>R</sup>L<sup>S</sup>D<sup>I</sup>S<sup>D</sup>S<sup>C</sup>L<sup>S</sup>M<sup>G</sup>T<sup>E</sup>T<sup>D</sup>G<sup>S</sup>I<sup>S</sup>SA<sup>V</sup>---EL  
At5g41310 LT<sup>L</sup>F<sup>P</sup>ET<sup>S</sup>N<sup>P</sup>PE<sup>M</sup>F<sup>E</sup>Q<sup>S</sup>E<sup>Q</sup>N---  
Os02g13580 S<sup>S</sup>V<sup>S</sup>N<sup>V</sup>AD<sup>Q</sup>E<sup>Q</sup>E<sup>K</sup>T<sup>S</sup>N<sup>T</sup>A---  
Os06g36080 Y<sup>D</sup>D<sup>S</sup>E<sup>G</sup>R<sup>L</sup>S<sup>D</sup>I<sup>S</sup>D<sup>S</sup>G<sup>L</sup>S<sup>M</sup>GA<sup>E</sup>T<sup>D</sup>C<sup>S</sup>M---SS<sup>V</sup>V  
Os01g54080 ---  
Os05g44560 V<sup>F</sup>P<sup>N</sup>SC<sup>S</sup>D<sup>R</sup>T---  
At1g18410 P<sup>V</sup>T<sup>P</sup>R---  
At1g73860 V<sup>T</sup>K<sup>R</sup>P<sup>P</sup>R<sup>I</sup>S<sup>D</sup>R<sup>A</sup>K<sup>S</sup>V<sup>T</sup>A<sup>K</sup>---  
Os11g44880 F<sup>E</sup>V<sup>T</sup>T<sup>S</sup>C<sup>S</sup>SE<sup>Q</sup>D<sup>M</sup>V<sup>R</sup>P<sup>T</sup>S<sup>A</sup>P<sup>K</sup>A<sup>P</sup>GS<sup>A</sup>N---  
OsKCH1 F<sup>D</sup>A<sup>A</sup>T<sup>S</sup>SP<sup>S</sup>D<sup>Q</sup>E<sup>M</sup>L<sup>L</sup>ST<sup>S</sup>G<sup>L</sup>K<sup>A</sup>D<sup>G</sup>I<sup>A</sup>---

Os03g18980 YQRYHSGTRDKQYLRNNSRKKDGNF-----EQQRPRF  
 At2g47500 GIGILPEDFYRRDLASDTSRIFSEHS-----YNI  
 At1g09170 REATRQVDKNCNSVVDKGLVVRKIP-----  
 ATK4 SLYGGKQDFEVQSI TDNESDE-----  
 AtKP1 NNHRLHTDNSSEAFQNHQKLSARKLF-----PEIEEEHIRHALHIRQGGVKKTRAES  
 OsKCH2 IEVPPKVQHSSSRKTPSSVLTAAQSLR-----KFRDSEENRSAPKPSVRE  
 AtKCBP -----  
 Os04g57140 -----  
 At1g55550 QMGPGSATKRSNINSNFEKDVMOKIGGTEFSRINSWLRSSQENRSYVLDKTLQPATHFLE  
 Os01g15540 EKGIVDIDNWLHQQIVEKTSTFRSKM-----VLDIPGVTEAEI  
 At5g27950 LSLSDSRKALLRRSYTKPLQAA-----  
 Os11g42800 FSYSSCKNAAKA-----  
 ATK2 -----  
 ATK3 -----  
 ATK5 -----  
 ATK1 -----  
 Os03g64415 -----  
 Os04g53760 -----  
 Os07g01490 -----  
 At2g22610 ELEMRLKEQEKHIQEMATREFPEVA-----NATPNEVKTCFKED  
 Os03g02290 MLQIKPRDLENNIQERTTLQDTNMILDSTNCMRVASTPGEAKAHLTREAMSEKEQHIL  
 At1g72250 RSSLAPTTSTSRMVMYLT RPPLSEST-----TSYDLPLPLNGGLKYSD  
 Os12g42160 NNPAGGAQPTKARRVSLCGGAHQQPA-----APPRRGS LIPLP  
 At5g27550 PSATASSNKTIMPRRRVSIATLRPEP-----SSLSS  
 Os05g33030 HIPLQPKRRSSLAVLPTQREQLSIFP-----DKRSV  
  
 Os06g11380 LKLRGIEEETWRQHVTGGKLEITTEEAKAFAIGNKALAALFVHTPAGELQRQIRAWLAEN  
 AtKCA1 SRMRGLEQDAGRQQVTGKVLREMQDEAKSFAIGNKALAALFVHTPAGELQRQIRLWLAEN  
 AtKCA2 SRIRGHQDQDTRQQVTGKVLREIQDEAKSFAIGNKPLAALFVHTPAGELQRQIRSWLAES  
 AtKinesin-12A ERECNAIIGQTRREDKIIIRLES LMDGVLSKEDFLDEEFASLLHEHKLLKDMYQNHPEVLKT  
 At3g10310 -----KTINGKGSHIRKSLRTIGKLINGSEK-----  
 Os01g14090 NATKKGSHLRKSIQSSIGKLIHGSERRNVQHLGQATPAKIANSTN-----  
 At1g63640 TLFPE TAKPLELIERPEARMTSEKLEKSVKMGKTEPK-----  
 At5g41310 -----  
 Os02g13580 -----  
 Os06g36080 ELTSLPDQDRVSGTQKEQHMAPSTPKDRLHKVATRA-----  
 Os01g54080 -----  
 Os05g44560 -----  
 At1g18410 -----  
 At1g73860 -----  
 Os11g44880 -----  
 OsKCH1 -----  
 Os03g18980 YSTNTDDSDDI DIATS DSSSESDALWQFNVSINSSIS-----  
 At2g47500 FMGNNNSTDDLDAATS DSSSEPDLLWQFNQSTKIPTRSN-----  
 At1g09170 --YEEEANESDETATSDCSETNLMWQLNVQVNMPPASNG-----  
 ATK4 -----AATSDCSDS DLLWRLSVQVNVPK-----  
 AtKP1 SKAKAKQPSPARFQKLDVGLSLRSDADSEAKVGNVYQTKGNHNVHISRFQNFVGVISL  
 OsKCH2 SMTKTRLD SATKPPQKEEQ TANKNTGTRV RSEAKIPRNISDIENEFANSEPTFH-----  
 AtKCBP -----  
 Os04g57140 -----  
 At1g55550 NLNRSLEKSPTQSFTTEKITGNELEGI EETKTNETVVNPTLMLKKLFELQCLCSAE----  
 Os01g15540 HVSSIPSPTTMACTKEDSQVKDEVMGLTQSSTDYVEDI-----  
 At5g27950 -----  
 Os11g42800 -----  
 ATK2 -----  
 ATK3 -----  
 ATK5 -----  
 ATK1 -----  
 Os03g64415 -----  
 Os04g53760 -----  
 Os07g01490 -----  
 At2g22610 NFGNENMESNTNILRTSNRLKTKRHDSLNLNEMTRKKRASRSGETE-----  
 Os03g02290 RSSDSMNKVTNNSIVGAPEVNVNEKKRRGDARNSSIGGELENQFV-----  
 At1g72250 LIEKVNQEMAEQVQIPKRIGAGRSSICAKRIPPAPRRKSFAPMPFIPITSTLTPDEKKS  
 Os12g42160 RRNSLMLPLPLPKPATPAAAA SPLDMITEQCSSPLVIAPNDIRGGG-----  
 At5g27550 METPSRPPPSFRGDP RKARYSKLFSPDRNLVTPNAMKSSRFMKSP-----  
 Os05g33030 SRLSHIQMPRRSIATFNSIPATPLAAAAHKQVDGTPPEARQLRRIE-----  
  
 Os06g11380 FEFLSVTGGDVAG-ASQLELLSTA IMDGWMAGLGTARPPSTDALGQLLSEYTKRVYTSQ

AtKCA1 FEFLSVTSDDVSGNGGQLELLSTAIMDGWMAGLGAAVPPHTDALGQLLSEYAKRVYTSQ  
 AtKCA2 FEFLSVTADDVSGVTGQLELLSTAIMDGWMAGVGAAVPPHTDALGQLLSEYAKRVYTSQ  
 AtKinesin-12A KIELERTQEEVENFKNFYGDGMGEREVLLLEIQDLKLQLQCYIDPSLKSALKTCTLLKLSY  
 At3g10310 -----  
 Os01g14090 -----  
 At1g63640 -----  
 At5g41310 -----  
 Os02g13580 -----  
 Os06g36080 -----  
 Os01g54080 -----  
 Os05g44560 -----  
 At1g18410 -----  
 At1g73860 -----  
 Os11g44880 -----  
 OsKCH1 -----  
 Os03g18980 -----  
 At2g47500 -----  
 At1g09170 -----  
 ATK4 -----  
 AtKP1 FSDLCAGDKSDSTLKS-----  
 OsKCH2 -----  
 AtKCBP -----  
 Os04g57140 -----  
 At1g55550 -----  
 Os01g15540 -----  
 At5g27950 -----  
 Os11g42800 -----  
 ATK2 -----  
 ATK3 -----  
 ATK5 -----  
 ATK1 -----  
 Os03g64415 -----  
 Os04g53760 -----  
 Os07g01490 -----  
 At2g22610 -----  
 Os03g02290 -----  
 At1g72250 -----  
 Os12g42160 -----  
 At5g27550 -----  
 Os05g33030 -----

Os06g11380 LHHLKDIAGTLATEVADDPAHVSKLRSALLESVDHKRRKIMQQMRDITVLLTKEEGGSPIR  
 AtKCA1 MQHMKDIAGTLAAEEAEDAGQVSKLRSALLESVDHKRRKILQQMRSDAALLNLEGGSSPIP  
 AtKCA2 MQHLKDIAGTLASEEAEDAGQVAKLRSALLESVDHKRRKILQQMRSDAALFTLEEGSSPVQ  
 AtKinesin-12A QAPPVNAIPESQDESLEKTLEQERLCWTEAETKWISLSSEELRTELEASKALINKQKHELE  
 At3g10310 -----RKENIPAD  
 Os01g14090 -----NDVPSSIT  
 At1g63640 -----DRTNIPSK  
 At5g41310 -----DKAHVGVG  
 Os02g13580 -----AKERLTRA  
 Os06g36080 -----SRTPPKT  
 Os01g54080 -----SAERAHKA  
 Os05g44560 -----ADTSIRRI  
 At1g18410 -----SNTTTSRP  
 At1g73860 -----SSTSSTRP  
 Os11g44880 -----GSASIAIK  
 OsKCH1 -----SRGAFIIK  
 Os03g18980 -----ENGSKIKK  
 At2g47500 -----IESKLLKP  
 At1g09170 -----SSTKLKKN  
 ATK4 -----VSNIQNSA  
 AtKP1 -----DSSETDNE  
 OsKCH2 -----SNRKAWKL  
 AtKCBP -----  
 Os04g57140 -----  
 At1g55550 -----EEDQILSR  
 Os01g15540 -----KQSKTDNQ  
 At5g27950 -----ANSPTPE  
 Os11g42800 -----RSVAFSSS  
 ATK2 -----

ATK3 -----  
 ATK5 -----  
 ATK1 -----  
 Os03g64415 -----  
 Os04g53760 -----  
 Os07g01490 -----  
 At2g22610 -----NNGDDPQM  
 Os03g02290 -----GSQNASRK  
 At1g72250 -----GANQVLCF  
 Os12g42160 -----GGGRNKKRI  
 At5g27550 -----GGGSSWK  
 Os05g33030 -----FSSSKFRS

Os06g11380 NPPTAAEDARLASLISLDNIIKQVKEVMRQSSARPLRKS KKKALLES LDDLLA QMPSLLD  
 AtKCA1 NPSTAAEDSRLASLISLDGILKQVKEITRQASVHVLSKSKKKALLES LDELTERMP SLLD  
 AtKCA2 NPSTAAEDSRLASLISLDAILKQVKEITRQASVHVLSKSKKKALLES LDELNERMP SLLD  
 AtKinesin-12A IEKRCGEELKEAMQMAMEGHARMLEQYADLEEKHMQLLARHRRIQDGI DDVKKAAARAGV  
 At3g10310 PRSPGLGVANNFSHIKSPDTSN-----  
 Os01g14090 PDLRLRRRQSLTGLPPPSTMS-----  
 At1g63640 IPKQTLKPPGQTRP-----  
 At5g41310 PSKPLKHTPKPDISK-----  
 Os02g13580 VNRVQKLTLPKAGQSSSL-----  
 Os06g36080 PQSPTLWPK-----  
 Os01g54080 PSRITRFFLTKNQPFSTS-----  
 Os05g44560 SSRIRFSLTKNGQPA-----  
 At1g18410 LDKLKQVTMRTT-----  
 At1g73860 LDKLRKVATRITS-----  
 Os11g44880 AQPKGAKSTDIRSTNPAKRAAP-----  
 OsKCH1 KPQTKNTKITATKIPNLA-----  
 Os03g18980 PQTKLRESSDTRTPLH-----  
 At2g47500 VSKPIRSPQSRNNSNNT-----  
 At1g09170 QSKISRVAAE TRSMIPSL-----  
 ATK4 NPKPKKIQR TAKL-----  
 AtKP1 PPSKSKNAQRNSSKNSLNHKLRTI-----  
 OsKCH2 PPQSTRQSQSIDLRASVREM-----  
 AtKCBP -----  
 Os04g57140 -----  
 At1g55550 FPIPGYEDDDESRYPPILENDGFSQHIDNEWFGVNNYSADWERD SPATIP LLECEPDLKQ  
 Os01g15540 FTKELCTPPFKEFSSNNEVKGHKNEHPVY-----  
 At5g27950 TPKRHIKD-----  
 Os11g42800 MPKMKCLPLKSDQIN-----

ATK2 -----  
 ATK3 -----  
 ATK5 -----  
 ATK1 -----  
 Os03g64415 -----  
 Os04g53760 -----  
 Os07g01490 -----  
 At2g22610 -----  
 Os03g02290 -----  
 At1g72250 -----  
 Os12g42160 -----  
 At5g27550 -----  
 Os05g33030 -----

Os06g11380 VDHPCAQKQIMEARKVVE SLQEDPDE-----PATDLNSNTLG ESEVSQWNVLQFNT  
 AtKCA1 IDHPCAQREIATAHQLVETIPEQEDTNILEQSHDRRPSLES ISSGETDVSQWNVLQFNT-  
 AtKCA2 VDHPCAQREIDTAHQLVETIPEQED---NLQDEKRPSIDSISSTETDVSQWNVLQFNTG  
 AtKinesin-12A RGAESRFINALAAEISALKVEKERQYLRDENKSLQTQLRDTAEAIQAAGELLVRLKEA  
 At3g10310 -----AKTMRRQSLTGVMPPGQERSRRSSI  
 Os01g14090 -----RRSSLGGKSDIGAKNSPISACAASE  
 At1g63640 -----SRLSIATSSSSKALTGAKRPTISTS  
 At5g41310 -----PSRLSISTSSKALTSSKRPVGTGS  
 Os02g13580 -----RPKPRDPAPARSSAATGVRKSSTSQ  
 Os06g36080 -----LRDPPPPSPISTSTGKVRVTQATS  
 Os01g54080 -----RPKPREVVPKTQGSMPGTAQATGG  
 Os05g44560 -----TSRPPKPDAPKTPNQTRVQSSQLI  
 At1g18410 -----NIAKATSALLSPSSQGMKKTGSASN  
 At1g73860 -----TVAKVTGLTSSSKGLASSSIKKTGS

|               |                                                              |
|---------------|--------------------------------------------------------------|
| Os11g44880    | -----LQK KINGPPSASTKNGKQLSLAAD                               |
| OsKCH1        | -----MKS PMSEKRLQTPIRNSKQLPFSTT                              |
| Os03g18980    | -----SQIP SASRKT SNGNRSGRQPLSGSD                             |
| At2g47500     | -----VSRPLASQKVGNGPRGMKQFGPADM                               |
| At1g09170     | -----IPTPTRTSLGAAISSPGQTSSRHN                                |
| ATK4          | -----SETRSLIPSLIPAPSKRPNTVNSQ                                |
| AtKP1         | -----YAHEDTSLVDDKPSNGTAHIKEGNN                               |
| OsKCH2        | -----EPLTEGKPRRSKAPHGDRTNVPLPE                               |
| AtKCBP        | -----                                                        |
| Os04g57140    | -----                                                        |
| At1g55550     | LLPELGLDRSL-----KPRGLAVAEGAAPLLRAQETLGER                     |
| Os01g15540    | -----HGRPRRSLQEELENCTLEKPNMDSK                               |
| At5g27950     | -----NSLQRKNMNDTSSPRSKMVTSSDPN                               |
| Os11g42800    | -----MSNNSIDSTAASAPRRRESFISRPA                               |
| ATK2          | -----                                                        |
| ATK3          | -----                                                        |
| ATK5          | -----                                                        |
| ATK1          | -----                                                        |
| Os03g64415    | -----                                                        |
| Os04g53760    | -----                                                        |
| Os07g01490    | -----                                                        |
| At2g22610     | -----RPTRTASGSSSQVPVAQKRVIKREQ                               |
| Os03g02290    | -----PGRVTATSKTAAATHKTGPVTRATR                               |
| At1g72250     | -----SPRQQPMRRGGGINVGMERVRLSIG                               |
| Os12g42160    | -----AGTTHGGGGGVMRARRVPVSGGR                                 |
| At5g27550     | -----VWSPLKFKNRRPSLVAIRSSASSSS                               |
| Os05g33030    | -----FSVQKRVILGSPAPVKSSLLSGTGI                               |
|               |                                                              |
| Os06g11380    | GTSAPFIIKCGANSSCELVIKADQKIQEPKGDEIIRVVPKPSVLAEMSFEIIGVFEEELP |
| AtKCA1        | GSSAPFIIKCGGNNSSELVIKADARVQEPKGGEIVRVVPRPSVLVNMSLEEMKQMFVQLP |
| AtKCA2        | GSSAPFIIKCGANSSELVIKADARIQEPKGGEIVRVVPRPSVLENMSLEEMKQVFGQLP  |
| AtKinesin-12A | EEGLTVAQKRAMDAEYEAAYRQIDKLLKKHENEINTLNQLVLPQSHIHNECSTKCDQAV  |
| At3g10310     | GGKPIENGGKDHVFTPFRLNKFNN-----                                |
| Os01g14090    | YKPLPFSWVRWPEQYQCSDKRGAKTPPPNSAAKAKRWL-----                  |
| At1g63640     | SSAKPLNRRR-----                                              |
| At5g41310     | SSVKPLNRKR-----                                              |
| Os02g13580    | ATPLARNNSTLKRGP-----                                         |
| Os06g36080    | SSRNSSTQKRWL-----                                            |
| Os01g54080    | SLAKPSKRR-----                                               |
| Os05g44560    | GGSSLRASKRWQK-----                                           |
| At1g18410     | FLKSPKDSKRWS-----                                            |
| At1g73860     | TSSLAKSSKRWA-----                                            |
| Os11g44880    | GKRAPNGKVSARK-----                                           |
| OsKCH1        | GGRRTRNGKINTPK-----                                          |
| Os03g18980    | SRRLSSNGRHAGTK-----                                          |
| At2g47500     | KRKATNARH-----                                               |
| At1g09170     | NSTVVVKKRQNPK-----                                           |
| ATK4          | PQRPTRDGRRLSLGT-----                                         |
| AtKP1         | NISMPEFRRSRSTHHARFMVP-----                                   |
| OsKCH2        | TRRSVSLPRGKMALV-----                                         |
| AtKCBP        | -----                                                        |
| Os04g57140    | -----                                                        |
| At1g55550     | GKGPFTFMQKLQALCFRILLGLGFMDVFGNDFNGLTK-----                   |
| Os01g15540    | SHRSHDDKHKTGKFTKFFQALQTAWIGALLALGTVSIQLEHGFFQSLTL-----       |
| At5g27950     | VRAKLCHHKRRMSSLT-----                                        |
| Os11g42800    | QRAPLHQHRRRMSSLT-----                                        |
| ATK2          | -----                                                        |
| ATK3          | -----                                                        |
| ATK5          | -----                                                        |
| ATK1          | -----                                                        |
| Os03g64415    | -----                                                        |
| Os04g53760    | -----                                                        |
| Os07g01490    | -----                                                        |
| At2g22610     | QEVVVKERDSKKKIWSR-----                                       |
| Os03g02290    | QQPAVNKTRGWVR-----                                           |
| At1g72250     | NRGRLAHRVLLTNARKAGLKETPQKQERWI-----                          |
| Os12g42160    | GGGGVQHNRKERGWNNGTSLRQLN-----                                |
| At5g27550     | ASDLLRREQ-----                                               |
| Os05g33030    | FNPALREKMMAAKIGNAQRFVNTNRRKSVL-----                          |

|               |                                                      |
|---------------|------------------------------------------------------|
| Os06g11380    | EAISSLALARTADGTRARYSRLYRTLANKVPALKDIVAEMEKGGVFKDVRS- |
| AtKCA1        | EALSSLALARTADGTRARYSRLYKTLAMKVPSLKDLVSELE-----       |
| AtKCA2        | EALSSLALARTADGTRARYSRLYRTLAMKVPSLRDLVGELEKGGVLKDTKST |
| AtKinesin-12A | EPSVNASSEQQWRDEFEPYKKEFEFSNLAEPWFSGYDRCNI-----       |
| At3g10310     | -----                                                |
| Os01g14090    | -----                                                |
| At1g63640     | -----                                                |
| At5g41310     | -----                                                |
| Os02g13580    | -----                                                |
| Os06g36080    | -----                                                |
| Os01g54080    | -----                                                |
| Os05g44560    | -----                                                |
| At1g18410     | -----                                                |
| At1g73860     | -----                                                |
| Os11g44880    | -----                                                |
| OsKCH1        | -----                                                |
| Os03g18980    | -----                                                |
| At2g47500     | -----                                                |
| At1g09170     | -----                                                |
| ATK4          | -----                                                |
| AtKP1         | -----                                                |
| OsKCH2        | -----                                                |
| AtKCBP        | -----                                                |
| Os04g57140    | -----                                                |
| At1g55550     | -----                                                |
| Os01g15540    | -----                                                |
| At5g27950     | -----                                                |
| Os11g42800    | -----                                                |
| ATK2          | -----                                                |
| ATK3          | -----                                                |
| ATK5          | -----                                                |
| ATK1          | -----                                                |
| Os03g64415    | -----                                                |
| Os04g53760    | -----                                                |
| Os07g01490    | -----                                                |
| At2g22610     | -----                                                |
| Os03g02290    | -----                                                |
| At1g72250     | -----                                                |
| Os12g42160    | -----                                                |
| At5g27550     | -----                                                |
| Os05g33030    | -----                                                |
